# Supplementary material for: Clinicians’ opinions on recommending aspirin to prevent colorectal cancer to Australians aged 50–70 years: a qualitative study
Source: PubMed Central journal article supplement — BMJ Open. 2021 Feb 5;11(2):e042261. doi: 10.1136/bmjopen-2020-042261 (PMC7925937; doi:10.1136/bmjopen-2020-042261), 2021-02-05
Supplement: bmjopen-2020-042261.draft_revisions.pdf [file bmjopen-2020-042261.draft_revisions.pdf]

# BMJ Open

BMJ Open is committed to open peer review. As part of this commitment we make the peer review history of every article we publish publicly available.

When an article is published we post the peer reviewers' comments and the authors' responses online. We also post the versions of the paper that were used during peer review. These are the versions that the peer review comments apply to.

The versions of the paper that follow are the versions that were submitted during the peer review process. They are not the versions of record or the final published versions. They should not be cited or distributed as the published version of this manuscript.

BMJ Open is an open access journal and the full, final, typeset and author-corrected version of record of the manuscript is available on our site with no access controls, subscription charges or pay-per-view fees (<http://bmjopen.bmj.com>).

If you have any questions on BMJ Open's open peer review process please email [info.bmjopen@bmj.com](mailto:info.bmjopen@bmj.com)

# BMJ Open

## Clinicians' opinions on recommending aspirin to prevent colorectal cancer to Australians aged 50 to 70 years: a qualitative study

|                               |                                                                                                                                                                                                                                                                                                                                                                                                                                                                                                                                                                                                                                                                                                                                                                                                                                                                                                                                                                                                                                                                                                                                                                                                                                                                                                                                                                                                                                                                                                                                                                                                                                                                                                                                                                                                                                                                          |
|-------------------------------|--------------------------------------------------------------------------------------------------------------------------------------------------------------------------------------------------------------------------------------------------------------------------------------------------------------------------------------------------------------------------------------------------------------------------------------------------------------------------------------------------------------------------------------------------------------------------------------------------------------------------------------------------------------------------------------------------------------------------------------------------------------------------------------------------------------------------------------------------------------------------------------------------------------------------------------------------------------------------------------------------------------------------------------------------------------------------------------------------------------------------------------------------------------------------------------------------------------------------------------------------------------------------------------------------------------------------------------------------------------------------------------------------------------------------------------------------------------------------------------------------------------------------------------------------------------------------------------------------------------------------------------------------------------------------------------------------------------------------------------------------------------------------------------------------------------------------------------------------------------------------|
| Journal:                      | <i>BMJ Open</i>                                                                                                                                                                                                                                                                                                                                                                                                                                                                                                                                                                                                                                                                                                                                                                                                                                                                                                                                                                                                                                                                                                                                                                                                                                                                                                                                                                                                                                                                                                                                                                                                                                                                                                                                                                                                                                                          |
| Manuscript ID                 | bmjopen-2020-042261                                                                                                                                                                                                                                                                                                                                                                                                                                                                                                                                                                                                                                                                                                                                                                                                                                                                                                                                                                                                                                                                                                                                                                                                                                                                                                                                                                                                                                                                                                                                                                                                                                                                                                                                                                                                                                                      |
| Article Type:                 | Original research                                                                                                                                                                                                                                                                                                                                                                                                                                                                                                                                                                                                                                                                                                                                                                                                                                                                                                                                                                                                                                                                                                                                                                                                                                                                                                                                                                                                                                                                                                                                                                                                                                                                                                                                                                                                                                                        |
| Date Submitted by the Author: | 30-Jun-2020                                                                                                                                                                                                                                                                                                                                                                                                                                                                                                                                                                                                                                                                                                                                                                                                                                                                                                                                                                                                                                                                                                                                                                                                                                                                                                                                                                                                                                                                                                                                                                                                                                                                                                                                                                                                                                                              |
| Complete List of Authors:     | Milton, Shakira; The University of Melbourne Faculty of Medicine Dentistry and Health Sciences, Department of General Practice; The University of Melbourne - Parkville Campus, Centre for Cancer Research<br>McIntosh, Jennifer; Monash University, Department of Software Systems & Cybersecurity; The University of Melbourne Faculty of Medicine Dentistry and Health Sciences, Department of General Practice<br>Yogaparan, Thivagar; The University of Melbourne Faculty of Medicine Dentistry and Health Sciences, Department of General Practice; The University of Melbourne - Parkville Campus, Centre for Cancer Research<br>Alphonse, Pavithran; The University of Melbourne - Parkville Campus, Centre for Cancer Research; The University of Melbourne Faculty of Medicine Dentistry and Health Sciences, Department of General Practice<br>Saya, Sibel; The University of Melbourne, Department of General Practice; The University of Melbourne Faculty of Medicine Dentistry and Health Sciences, Department of General Practice<br>Karnchanachari, Napin; The University of Melbourne - Parkville Campus, Centre for Cancer Research; The University of Melbourne Faculty of Medicine Dentistry and Health Sciences, Department of General Practice<br>Nguyen, Peter; The University of Melbourne - Parkville Campus, Centre for Cancer Research; The University of Melbourne Faculty of Medicine Dentistry and Health Sciences, Department of General Practice<br>Lau, Phyllis; The University of Melbourne Faculty of Medicine Dentistry and Health Sciences, Department of General Practice<br>Macrae, Finlay; Royal Melbourne Hospital, Colorectal Medicine and Genetics<br>Emery, Jon; The University of Melbourne Faculty of Medicine Dentistry and Health Sciences, Department of General Practice; Cambridge University, The Primary Care Unit |
| Keywords:                     | GENERAL MEDICINE (see Internal Medicine), Gastroenterology < INTERNAL MEDICINE, Epidemiology < ONCOLOGY, PREVENTIVE MEDICINE, PRIMARY CARE, QUALITATIVE RESEARCH                                                                                                                                                                                                                                                                                                                                                                                                                                                                                                                                                                                                                                                                                                                                                                                                                                                                                                                                                                                                                                                                                                                                                                                                                                                                                                                                                                                                                                                                                                                                                                                                                                                                                                         |
|                               |                                                                                                                                                                                                                                                                                                                                                                                                                                                                                                                                                                                                                                                                                                                                                                                                                                                                                                                                                                                                                                                                                                                                                                                                                                                                                                                                                                                                                                                                                                                                                                                                                                                                                                                                                                                                                                                                          |

SCHOLARONE™  
Manuscripts

1  
2  
3  
4  
5  
6  
7  
8  
9  
10  
11  
12  
13  
14  
15  
16  
17  
18  
19  
20  
21  
22  
23  
24  
25  
26  
27  
28  
29  
30  
31  
32  
33  
34  
35  
36  
37  
38  
39  
40  
41  
42  
43  
44  
45  
46  
47  
48  
49  
50  
51  
52  
53  
54  
55  
56  
57  
58  
59  
60

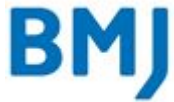

I, the Submitting Author has the right to grant and does grant on behalf of all authors of the Work (as defined in the below author licence), an exclusive licence and/or a non-exclusive licence for contributions from authors who are: i) UK Crown employees; ii) where BMJ has agreed a CC-BY licence shall apply, and/or iii) in accordance with the terms applicable for US Federal Government officers or employees acting as part of their official duties; on a worldwide, perpetual, irrevocable, royalty-free basis to BMJ Publishing Group Ltd ("BMJ") its licensees and where the relevant Journal is co-owned by BMJ to the co-owners of the Journal, to publish the Work in this journal and any other BMJ products and to exploit all rights, as set out in our [licence](#).

The Submitting Author accepts and understands that any supply made under these terms is made by BMJ to the Submitting Author unless you are acting as an employee on behalf of your employer or a postgraduate student of an affiliated institution which is paying any applicable article publishing charge ("APC") for Open Access articles. Where the Submitting Author wishes to make the Work available on an Open Access basis (and intends to pay the relevant APC), the terms of reuse of such Open Access shall be governed by a Creative Commons licence – details of these licences and which [Creative Commons](#) licence will apply to this Work are set out in our licence referred to above.

Other than as permitted in any relevant BMJ Author's Self Archiving Policies, I confirm this Work has not been accepted for publication elsewhere, is not being considered for publication elsewhere and does not duplicate material already published. I confirm all authors consent to publication of this Work and authorise the granting of this licence.

Current formatting for publication in BMJ Open

# Clinicians' opinions on recommending aspirin to prevent colorectal cancer to Australians aged 50 to 70 years: a qualitative study

Shakira Milton<sup>1,2</sup>, Jennifer McIntosh<sup>2,3</sup>, Thivagar Yogaparan<sup>1,2</sup>, Pavithran Alphonse<sup>1,2</sup>, Sibel Saya<sup>1,2</sup>, Napin Karnchanachari<sup>1,2</sup>, Peter Nguyen<sup>1,2</sup>, Phyllis Lau<sup>2</sup>, Finlay Macrae<sup>4,5</sup>, Jon Emery<sup>1,2,6</sup>

## Author Affiliations

1. Centre for Cancer Research, University of Melbourne, Melbourne, Australia
2. Department of General Practice, University of Melbourne, Melbourne, Australia
3. Department of Software Systems & Cybersecurity, Monash University, Melbourne, Australia
4. Department of Medicine, The University of Melbourne, Melbourne
5. Colorectal Medicine and Genetics, The Royal Melbourne Hospital, Melbourne, Australia
6. The Primary Care Unit, University of Cambridge, Cambridge, United Kingdom

## Author's email addresses:

|                                                                                  |                                                                                          |
|----------------------------------------------------------------------------------|------------------------------------------------------------------------------------------|
| <a href="mailto:shakira.milton@unimelb.edu.au">shakira.milton@unimelb.edu.au</a> | <a href="mailto:jenny.mcintosh@monash.edu">jenny.mcintosh@monash.edu</a>                 |
| <a href="mailto:thivagaryogaparan@gmail.com">thivagaryogaparan@gmail.com</a>     | <a href="mailto:p.alphonse@student.unimelb.edu.au">p.alphonse@student.unimelb.edu.au</a> |
| <a href="mailto:sibel.saya@unimelb.edu.au">sibel.saya@unimelb.edu.au</a>         | <a href="mailto:napin@unimelb.edu.au">napin@unimelb.edu.au</a>                           |
| <a href="mailto:peter.nguyen2@unimelb.edu.au">peter.nguyen2@unimelb.edu.au</a>   | <a href="mailto:plau@unimelb.edu.au">plau@unimelb.edu.au</a>                             |
| <a href="mailto:finlay.macrae@mh.org.au">finlay.macrae@mh.org.au</a>             | <a href="mailto:jon.emery@unimelb.edu.au">jon.emery@unimelb.edu.au</a>                   |

## Corresponding author:

Shakira Milton  
Centre for Cancer Research  
Level 10, 305 Grattan Street  
Melbourne, VIC 3000  
E: [shakira.milton@unimelb.edu.au](mailto:shakira.milton@unimelb.edu.au)  
T: +61 3 85597085

**Acknowledgements:** The authors would like to acknowledge Primary Care Collaborative Cancer Clinical Trials Group (PC4) for supporting this project.

**Keywords:** Preventative medicine, General practice, Primary care, Cancer prevention, Bowel cancer, Aspirin, Guideline implementation, Chemoprevention

**Word Count:** 3,638

Current formatting for publication in BMJ Open

## 34 Abstract

### 35 Objectives

36 Australian guidelines recommend all 50 to 70-year-olds without existing contraindications consider  
37 taking low-dose aspirin (100 mg – 300 mg per day) for at least 2.5 years to reduce their risk of  
38 developing colorectal cancer.

39 We aimed to explore clinicians' attitudes, practices, knowledge, opinions, and barriers and facilitators  
40 to the implementation of these new guidelines.

### 41 Methods

42 Semi-structured interviews were conducted with clinicians to whom the new guidelines may be  
43 applicable (familial cancer clinic staff (geneticists, oncologists and genetic counsellors),  
44 gastroenterologists, pharmacists, and general practitioners (GPs)).

45 The Consolidated Framework for Implementation Research (CFIR) underpinned the development of  
46 the interview guide. Coding was inductive and themes were developed through consensus between the  
47 authors.

48 Emerging themes were mapped onto the CFIR domains: characteristics of the intervention, outer  
49 setting, inner setting, individual characteristics and process.

### 50 Results

51 Sixty-four interviews were completed between March and October 2019. Aspirin was viewed as a  
52 safe and cheap option for cancer prevention. GPs were considered by all clinicians as the most  
53 important health professionals for implementation of the guidelines. Cancer Council Australia, as a  
54 trusted organisation, was an important facilitator to guideline adoption. Uncertainty about aspirin  
55 dosage and perceived strength of the evidence, precise wording of the recommendation, previous  
56 changes to guidelines about aspirin, and conflicting findings from trials in older populations were  
57 barriers to implementation.

### 58 Conclusion

59 Widespread adoption of these new guidelines could be an important strategy to reduce the incidence  
60 of bowel cancer, but this will require more active implementation strategies focused on primary care  
61 and the wider community.

### 62 Strengths and limitations of this study

63 Up to five short bullet points, no longer than one sentence each, that relate specifically to the methods.  
64 They should not include the results of the study.

- 65 • We recruited a large and diverse group of participants representing different clinical  
66 disciplines, varied length of experience, and work settings.
- 67 • We applied an established theoretical framework to study guideline implementation
- 68 • We recruited participants only from one state, Victoria, but we believe our findings are likely  
69 to be transferable to other Australian clinicians
- 70 • We acknowledge that there may be other barriers and facilitators experienced by clinicians  
71 from remote locations.

72

Current formatting for publication in BMJ Open

## 73 Introduction

74 In 2019, colorectal cancer (CRC) was the second most commonly diagnosed cancer in Australia in  
75 men and women (9,069 cases and 7,329 cases, respectively).<sup>1</sup> In November 2017, Cancer Council  
76 Australia updated their guidelines for the prevention of CRC to recommend that all people aged 50-70  
77 who are at average risk of CRC actively consider taking low-dose aspirin to reduce their risk of CRC.<sup>2</sup>  
78 Despite the publication of these national guidelines recommending a significant change in CRC  
79 prevention strategy, it has not been accompanied by an implementation strategy, rather relying on  
80 passive diffusion of the guidelines into clinical practice.

81 The new guidelines were endorsed by the National Health and Medical Research Council (NHMRC)  
82 and adopted by the Royal Australian College of General Practitioners (RACGP). Meta-analyses of  
83 randomised controlled trials of low-dose aspirin have demonstrated reduced incidence and mortality  
84 from colorectal cancer by 25% and 33% respectively, as well as a 33% reduction in all-cause cancer  
85 mortality, when taken for at least 2.5 years.<sup>3</sup> In addition to reducing the risk of colorectal cancer,  
86 aspirin also reduces the risk of cardiovascular disease including myocardial infarctions, ischaemic  
87 strokes and transient ischaemic attacks by 6% per annum in primary prevention trials<sup>4</sup> However,  
88 aspirin can cause side-effects including gastrointestinal haemorrhage, peptic ulcer and haemorrhagic  
89 stroke.

90 This project aimed to explore clinicians' attitudes, practices, knowledge, opinions, and barriers and  
91 facilitators to the implementation of these guidelines, with the intention of developing implementation  
92 methods to increase the uptake of aspirin for CVD and CRC prevention, and reduce development of  
93 colorectal cancer in the Australian population.

## 94 Methods

### 95 Approach

96 A qualitative study using semi-structured interviews was conducted with a range of health  
97 professionals whom the new guidelines were most likely to directly impact, including  
98 gastroenterologists, geneticists, oncologists, genetic counsellors and general practitioners. A  
99 constructivist paradigm was used to generate new ideas from participants, using interviews to explore  
100 current practice, knowledge and opinions toward recommending aspirin to people at average risk of  
101 CRC and potential barriers and facilitators to implementing the guidelines.

### 102 Setting and sampling strategy

103 Purposive sampling was used to achieve maximum variation in profession type, age, gender, years of  
104 experience and those working in both rural and urban Victoria, and public and private practice  
105 settings. Recruitment was done through personal networks of the authors, as well as snowball  
106 sampling through social media posts, emailing and cold calling. As we sent out recruitment messages  
107 through different sources all participants opted in on their own. All participants provided written  
108 consent. General practitioners, as private practitioners, were reimbursed \$100 for their time as this  
109 group was the most difficult to recruit. Recruitment of all participants occurred between February and  
110 September 2019.

### 111 Data collection techniques

112 A semi-structured interview guide was developed based on the Consolidated Framework for  
113 Implementation Research (CFIR)<sup>5</sup> (Figure 1). CFIR is a conceptual framework developed to guide the  
114 assessment of implementation contexts. It consists of five constructs representing all areas of a  
115 healthcare setting that impact upon the successful implementation of a new intervention.<sup>6</sup> The  
116 interview questions were adapted from the online CFIR guide, which provides a list of potentially  
117 relevant interview questions for each of the constructs.<sup>5</sup> In this study, the 'intervention' was defined as  
118 the national guideline recommending consideration of aspirin for CRC prevention.

Current formatting for publication in BMJ Open

119 The interviews were conducted by three researchers by authors SM, PA and TY who had no existing  
 120 relationships with the participants. The interviewing researchers disclosed their position in the  
 121 research to the participants and they were aware why the research was being conducted. Researcher  
 122 SM who interviewed the general practitioners, geneticists, oncologists and genetic counsellors is a  
 123 highly experienced female qualitative researcher. Researchers PA who interviewed pharmacists and  
 124 TY who interviewed gastroenterologists both males were students who were trained in qualitative  
 125 methods and supervised by the authors. Interviews were audio recorded and transcribed verbatim.  
 126 Field notes on the time and location were recorded in researchers' notebook following the interviews.  
 127 Researchers met regularly to review the interview transcripts and discuss data and the emerging  
 128 themes. Interview transcripts were not returned to participants.

129 **Analysis**

130 Qualitative analysis was managed using NVivo 12<sup>7</sup>. Complete coding was employed by the author  
 131 who interviewed the participant. For enhanced interpretive rigour, several interviews in each  
 132 participant group were co-coded by another researcher and progressively checked in regular  
 133 researcher meetings. The coding for several interviews per clinician type was checked by a second  
 134 researcher.

135 After first-level coding, codes were grouped into themes. Themes were then mapped onto the  
 136 constructs from the CFIR<sup>6</sup>: characteristics of intervention, outer setting, inner setting, characteristics  
 137 of individuals and process (Figure 1).

| <i><b>Implementation</b></i>                                                                                                                                                                                                                                   |                                                                                                                                                                            |                                                                                                                                                                                |                                                                                                                                                                                                                                                             |                                                                                                                                            |
|----------------------------------------------------------------------------------------------------------------------------------------------------------------------------------------------------------------------------------------------------------------|----------------------------------------------------------------------------------------------------------------------------------------------------------------------------|--------------------------------------------------------------------------------------------------------------------------------------------------------------------------------|-------------------------------------------------------------------------------------------------------------------------------------------------------------------------------------------------------------------------------------------------------------|--------------------------------------------------------------------------------------------------------------------------------------------|
| <i><b>Characteristics of Intervention</b></i>                                                                                                                                                                                                                  | <i><b>Inner Setting</b></i>                                                                                                                                                | <i><b>Outer Setting</b></i>                                                                                                                                                    | <i><b>Individuals Involved</b></i>                                                                                                                                                                                                                          | <i><b>Implementation Process</b></i>                                                                                                       |
| <ul style="list-style-type: none"> <li>- Intervention source</li> <li>- Evidence strength and quality</li> <li>- Relative advantage</li> <li>- Adaptability</li> <li>- Trialability</li> <li>- Complexity</li> <li>- Design quality</li> <li>- Cost</li> </ul> | <ul style="list-style-type: none"> <li>- Structural characteristics</li> <li>- Networks and communications</li> <li>- Culture</li> <li>- Implementation climate</li> </ul> | <ul style="list-style-type: none"> <li>- Patient needs and resources</li> <li>-Cosmopolitanism</li> <li>- Peer pressure</li> <li>- External policies and incentives</li> </ul> | <ul style="list-style-type: none"> <li>- Knowledge and beliefs about the intervention</li> <li>- Self-efficacy</li> <li>- Individual stage of change</li> <li>- Individual identification with organisation</li> <li>- Other personal attributes</li> </ul> | <ul style="list-style-type: none"> <li>- Planning</li> <li>- Engaging</li> <li>- Executing</li> <li>- Reflecting and evaluating</li> </ul> |

138 *Figure 1. Overview of the Consolidated Framework for Implementation Research. The CFIR provides*  
 139 *constructs that have been associated with effective implementation.*<sup>6</sup>

140



Current formatting for publication in BMJ Open

## Results

Sixty-four participants were interviewed (Table 1). Interviews ranged from 20-50-minutes and were face-to-face in the participants place of work, except for four GPs who were interviewed on the phone. The participants opted in by responding to recruitment messages and none dropped out. All participants were interviewed once. The interviews were conducted in participants' place of work, either in a clinic, pharmacy or hospital consulting room or meeting room. The researcher and participants were the only ones present during the interviews, except for with pharmacists if there were shopkeepers or pharmacy assistants present. We present the results according to the domains of CIFR.

Table 1. Characteristics of participants.

| Characteristics                                  |    |
|--------------------------------------------------|----|
| Mean age (years)                                 | 41 |
| Sex, female (n)                                  | 35 |
| Profession (n)                                   |    |
| Gastroenterologist                               | 17 |
| Pharmacist                                       | 14 |
| General practitioner                             | 16 |
| Familial cancer on (FCC) staff                   |    |
| Genetic counsellor                               | 10 |
| Geneticists                                      | 4  |
| Oncologist                                       | 3  |
| Years in profession (n)                          |    |
| <10                                              | 23 |
| 10 – 19                                          | 22 |
| 20 – 29                                          | 8  |
| 30+                                              | 11 |
| Work setting                                     |    |
| General practice (%)                             |    |
| Bulk-billing clinic                              | 31 |
| Private                                          | 69 |
| Hospital (gastroenterologists and FCC staff) (%) |    |
| Public                                           | 77 |
| Private                                          | 23 |
| Pharmacy (%)                                     |    |
| Hospital                                         | 36 |
| Community                                        | 64 |

### 1. Characteristics of the Intervention

#### Aspirin

Many participants expressed confusion regarding the dose of aspirin to be used. While some participants were comfortable deciding on a dose within the 100 – 300mg range recommended in the guideline, others felt this range created uncertainty. (Quotations 1a and 1b)

- 1a “Well I think the range is ambiguous there. The numbers are not ambiguous at all there I suppose but it's just - it's out with normal practice I guess” General Practitioner, 30 years old
- 1b “And I think the risk in data coming out is how much is useful, like the dosage. We used to think that a low dose used to be good for other cardiovascular events, but in fact maybe it isn't depending on gender, age and weight.” Gastroenterologist, 47 years old

Current formatting for publication in BMJ Open

162 Aspirin was perceived as cheap, safe and readily available by many participants, who stated this  
 163 would facilitate their prescribing and patient uptake. With the rising costs of healthcare, participants  
 164 thought the cheap nature of aspirin facilitated the implementation of the guidelines. (Quotation 1c)  
 165 Barriers to implementation included concerns about possible side-effects of aspirin such as  
 166 gastrointestinal bleeding and contraindications in people with multiple comorbidities. (Quotation 1d)

- 167 • 1c *“It's cheap, which is the other thing; and, again, in the Australian healthcare system,*  
 168 *where there are costs associated with a lot of treatments, to be able to recommend something*  
 169 *that is - we're saying safe, the exception being the gastric irritation, and effective, and it's not*  
 170 *going to break the bank for them to use it.” General practitioner, 62 years*
- 171 • 1d *“And in terms of weighing up the side effects from aspirin, we've got the issue of the*  
 172 *potential for those individuals who have got other comorbidities whether it's renal or*  
 173 *allergies to aspirin or risk of stroke etc etc. You've got to weigh all those factors up before*  
 174 *you consider putting someone on aspirin” Gastroenterologist, 59 years old*

### 175 CCA guideline

176 Many participants mentioned the specific phrasing of the guidelines, namely that aspirin should be  
 177 “actively considered”. This language did not sufficiently encourage them to prioritise the  
 178 recommendation, and implied uncertainty about the strength of evidence. (Quotation 1e)

- 179 • 1e *“Because it's not strong, also, perhaps that's something that will be its - not its downfall,*  
 180 *but will be negative because we already have a lot of strong guidelines” Geneticist, 32 years*  
 181 *old*

182 Guidelines on the use of aspirin for disease prevention have changed over time, generating confusion  
 183 among participants. Historically, aspirin was recommended for primary prevention of cardiovascular  
 184 disease in certain at-risk patients, but guidelines were later altered, recommending it only for  
 185 secondary prevention. Participants stated that it is hard to keep up with the latest recommendations,  
 186 and that this ongoing change in advice caused reluctance to recommend them. (Quotation 1f)

- 187 • 1f *“With aspirin, it was always for stroke prevention, and now they're turning around and*  
 188 *saying no, we shouldn't be doing it for that! And you sort of wonder, well, is this going to be*  
 189 *the same sort of thing? The, one of the issues with medications and guidelines as such is that*  
 190 *they keep changing.” Pharmacist, 50 years old*

## 191 2. Inner Setting

192 Despite the variety of specialities and workplace types, a common theme emerged of competing  
 193 demands on clinicians' time limiting their capacity to discuss aspirin for the prevention of CRC.  
 194 (Quotations 2a, 2b) Pharmacists suggested they could support GPs in counselling patients, given GPs  
 195 have relatively short consultation times with their patients. Pharmacists commented on the closeness  
 196 of their location to GP clinics and their potential to reiterate advice about aspirin given by the GP.  
 197 (Quotation 2c)

- 198 • 2a *“I think time's our major challenge. There's just not enough time to... especially that the*  
 199 *pace that endoscopy list goes is fast and I think in private it's much faster. Public, even then;*  
 200 *even if it's not pace, the patients had an anaesthetic - it's not really an appropriate time to be*  
 201 *talking to them about long-term stuff.” Gastroenterologist, 50 years old*
- 202 • 2b *“So we only actually see people when we can offer genetic testing and the rest of our work*  
 203 *is done over the phone or we send letters. We are absolutely flat out at the moment. This is*  
 204 *probably the only time today I will be sitting and not running around.” Genetic counsellor, 35*  
 205 *years old*

Current formatting for publication in BMJ Open

- 1  
2  
3 206 • 2c *"I think, we should, way of promoting it, and probably we should be more proactive with*  
4 207 *it, GPs tend to not... especially, one of the pharmacies I work at is next to a bulk billing clinic*  
5 208 *doctors are very much get them in, get them out, and don't spend much time with them. so*  
6 209 *that's where we can often come in to be that extra person that can either reinforce what the*  
7 210 *doctor's told them or suggest other things. So, we should be there in the front line, yeah,*  
8 211 *promoting health."* Pharmacist, 50 years old

### 3. Outer Setting

12 213  
13 214 Cancer Council Australia was perceived as a trustworthy organisation and this gave greater weight to  
14 215 and trust in the guidelines. (Quotation 3a)

- 15 216 • 3a *"Look as long as this is done by the Cancer Council of Victoria, I'm trusting them so it*  
16 217 *depends who is it behind, but this is a credible source of information I would have hoped."*  
17 218 *General Practitioner, 58 years old*

18 219 The initial results of the Aspirin in Reducing Events in the Elderly (ASPREE) Trial were published  
19 220 after the Cancer Council Australia national clinical guidelines were released, and shortly before  
20 221 interviews for this study were conducted.<sup>8</sup> The ASPREE trial showed low-dose aspirin provided no  
21 222 benefit in participants aged 70-80 years over a short-term follow up of 4.7 years. Some participants in  
22 223 our study, despite varying degrees of knowledge of the ASPREE trial results, were hesitant to  
23 224 recommend aspirin for people even in the 50 to 70-year-old group covered by the guidelines, due to  
24 225 the findings of the ASPREE trial in an older cohort. (Quotations 3b and 3c).

- 25 226 • 3b *"So that negative study for aspirin in older patients; kind of makes me think- should I be*  
26 227 *giving it to someone with average risk of colorectal cancer?" Gastroenterologist, 32 years*  
27 228 *old*
- 28 229 • 3c *"So there was a big study here in Australia, and then a little bit of input from the US done*  
29 230 *over the last few years, came out last year, the ASPREE study, so I did a talk on it, so I looked*  
30 231 *at the primary prevention of aspirin in the cardiovascular disease, and it showed that low-*  
31 232 *dose aspirin for healthy older adults had no impact on primary prevention and*  
32 233 *cardiovascular risk"* Pharmacist, 26 years old

### 4. Characteristics of Individuals

33 234  
34 235 **Whose role is it to recommend aspirin?**

35 236 Hospital-based clinicians generally supported the guidelines and saw their role as advocates rather  
36 237 than implementers of the guidelines. (Quotations 4a and 4b) All participants, including GPs, saw that  
37 238 the primary responsibility to implement the aspirin guidelines rested in primary care. (Quotations 4c  
38 239 and 4d)

- 39 241 • 4a *"So, you know I'm a Geneticist. I think talking to GPs and Gastroenterologists would be a*  
40 242 *much better group [laughs] than Geneticists."* Geneticist, 34 years old
- 41 243 • 4b *"People are still very GP centred, so a lot of, even if we suggest things like this, a lot of*  
42 244 *people would still then go and talk to their GP before they decided to start something."*  
43 245 *Pharmacist, 50 years old*
- 44 246 • 4c *"If you understand what I mean, it's absolutely...I agree with those specialists, I do think it*  
45 247 *is part of the role of the GP to talk about these preventative health issues specifically*  
46 248 *prescribing aspirin"* General practitioner, 28 years old

Current formatting for publication in BMJ Open

- 249 • 4d *"It's interesting when new guidelines come out, because guidelines come out all the time,*  
250 *and this is a really - this is our bread and butter as a GP" General practitioner, 48 years old*

### 251 Knowledge / awareness of the CCA guidelines

252 Knowledge and awareness of the guidelines was mixed. The FCC staff were more knowledgeable of  
253 the guidelines, specifically as they work with populations at increased risk of CRC, and awareness of  
254 recommendations about aspirin use in people with Lynch syndrome. Whereas GPs, pharmacists and  
255 gastroenterologists were either unaware or had limited knowledge of the guidelines. (Figure 4.  
256 quotations 4e and 4f)

- 257 • 4e *"All I know about low-dose aspirin in bowel cancer is that it can be used, but in certain*  
258 *populations, but beyond that, I actually really don't know." Geneticist, 32 years old*
- 259 • 4f *"I would say that going across, we have three different clinicians at work and I don't think*  
260 *I've ever heard them recommend aspirin for someone who actually doesn't have something*  
261 *like Lynch syndrome." Genetic counsellor, 57 years old*

## 262 5. Process

### 263 Implementation of the CCA guidelines

264 While most participants considered themselves as early adopters, they admitted that clinicians in  
265 general would wait before adopting clinical guidelines. (Quotation 5a) Most health professionals  
266 agreed that patients would be receptive to taking extra medication such as aspirin for CRC prevention.  
267 (Quotation 5b) Nevertheless, a decision aid was thought to be potentially useful to facilitate  
268 discussion about the risks and benefits of taking aspirin. (Quotation 5c) Several participants could see  
269 how they could discuss aspirin as part of their usual consultation. (Quotation 5d)

- 270 • 5a *"Other doctors like to be on the tail end because they've been burnt a few times when*  
271 *things have kind of flipped back the other way." General practitioner, 38 years old*
- 272 • 5b *"You know, I think the people who already take tablets for something find it quite easy to*  
273 *beguile an extra tablet. So, someone's already on a cholesterol tablet, they're on a high blood*  
274 *pressure tablet, it's easy for them to add aspirin to that." Gastroenterologist, 60 years old*
- 275 • 5c *"Well that (a decision aid) might have been useful for the patient to show them what could*  
276 *happen and how effective it is if they ask." General practitioner, 58 years old*
- 277 • 5d *"You know, I appreciate they're guidelines and they're not mandatory, and if it fits in with*  
278 *the way I would practice, I'm happy to sort of incorporate them into what I do."*  
279 *Gastroenterologist, 65 years old*

## 280 Discussion

281 This is the first study to our knowledge to examine the perspectives of a wide range of Australian  
282 clinicians about recommending aspirin to reduce bowel cancer risk. Aspirin was considered as readily  
283 available, affordable and safe. However, the ambiguity about the recommended dose and perceived  
284 strength of the evidence was a concern for several clinicians. The media attention about the ASPREE  
285 trial<sup>9</sup> added to the perceived uncertainty about the evidence. Busy work environments meant limited  
286 time to spend on prevention. The endorsement from Cancer Council Australia, a nationwide not-for-  
287 profit organisation, meant the guidelines were perceived as trustworthy and therefore more likely to  
288 be implemented.

289 FCC staff and gastroenterologists are generally aware of aspirin recommendations for patients at  
290 increased CRC risk and suggested that GPs are better placed to discuss aspirin in those at average  
291 risk. These hospital specialists felt they could advocate the use of aspirin but the ultimate  
292 responsibility for initiation rested in general practice. Pharmacists similarly felt they could facilitate

Current formatting for publication in BMJ Open

293 the process but would not initiate discussions about aspirin. GPs agreed that this was part of their role,  
294 for example when discussing bowel cancer screening, but had limited awareness of the guidelines.

295 There is often a large investment of time, resources and clinical expertise involved in producing  
296 national clinical guidelines, however, there is typically no accompanying strategy to implement  
297 them.<sup>10,11</sup> Between 2003 and 2007, 313 clinical practice guidelines were produced in Australia by over  
298 80 guideline producers<sup>12</sup>, but with limited clinical uptake.<sup>13,14</sup>

299 The uptake of guidelines into clinical practice is influenced by several factors including the guideline  
300 characteristics, ease of implementation, clarity of the guidelines and individual clinicians' familiarity  
301 with the intervention and evidence.<sup>15</sup> Our study highlights several of these factors which could act as  
302 barriers to widespread implementation of the aspirin guidelines. Superficially, one might expect  
303 recommending a familiar, low cost, over-the-counter drug would be easily implemented. But lack of  
304 clarity, partly due to the specific wording of the recommendation, could alter perceptions of the  
305 evidence and jeopardise uptake of the guideline.

306 Uncertainties amongst clinicians about the evidence for aspirin in disease prevention is exacerbated  
307 by changes in recommendations about its use in cardiovascular disease. The Cancer Council Australia  
308 guideline specifically considered the evidence as it relates to preventing colorectal cancer. It did not  
309 discuss related evidence of reduced incidence and mortality from other cancers<sup>3</sup> or for the primary  
310 prevention of cardiovascular disease.<sup>16</sup> The US Preventative Services Taskforce recommends aspirin  
311 for CRC prevention only in people who are also at moderately increased risk of cardiovascular  
312 disease.<sup>17</sup> In addition, their recommendations about its use are stronger for people aged 50 to 59  
313 years, compared with those aged 60 to 69 years because the risk of serious side-effects from aspirin  
314 increases with age.

315 There was little awareness amongst many participants of the additional effects of aspirin on all-cancer  
316 incidence and mortality, but this is an important additional consideration for patients when making  
317 informed decisions about taking aspirin. Clinicians in our study recognised the potential benefit of a  
318 decision aid to support discussions about taking aspirin. There is strong evidence to show that  
319 decision aids can support informed decision making, particularly when decisions require weighing up  
320 benefits and risks which are preference sensitive.<sup>18</sup> Patients need to understand the potential benefits  
321 of aspirin in terms of reduced incidence and death from cancer and cardiovascular disease, and harms  
322 from gastrointestinal and intracranial haemorrhage. In a vignette study testing graphical approaches to  
323 communicating these harms and benefits from aspirin, over 70% of Australian patients aged 50-70  
324 were willing to take aspirin for disease prevention.<sup>19</sup> The use of a decision aid has the potential to  
325 inform the clinicians, which would enhance the clarity of the recommendation, and facilitate a  
326 discussion about the aspirin guidelines with patients.

### 327 Implications & limitations

328 In this in-depth qualitative study, we recruited a large sample of diverse participants representing  
329 different clinical disciplines, varied length of experience, and work settings. Although we recruited  
330 participants only from Victoria, we believe our findings are likely to be transferable to other  
331 Australian clinicians although we acknowledge that there may be other barriers and facilitators  
332 experienced by clinicians from remote locations.

333 The national guidelines on aspirin represent an important new approach to reducing the incidence and  
334 mortality of bowel cancer in Australia. But the absence of a strategic and more active implementation  
335 plan, means these guidelines are less likely to be translated into clinical practice.<sup>20</sup> Specific  
336 implementation strategies for general practice are necessary to increase the awareness and uptake of  
337 these guidelines. This could be supplemented by approaches to raise awareness in the community  
338 about the role of aspirin and tools to facilitate discussions between GPs and patients and support  
339 informed choices about CRC prevention.

Current formatting for publication in BMJ Open

340 **Author statement:**

341 Conception or design of the work: SM JM, FM, and JE. Acquisition, analysis or interpretation of data:  
342 SM, JM, TV, PA, SS NK, PN. Drafting the work: SM. Critically revising the work: SM, SS, PL and  
343 JE. Final approval of submitted version: all authors.

344 **Ethics Approval:** Ethical approval was provided by the Human Ethics Sub-Committee of the  
345 University of Melbourne (Ethics ID:1853266) and all participants provided informed written consent  
346 before taking part in this project.

347 **Twitter:** Shakira Milton @ShakiraMilton

348 **ORCID IDs:** Shakira Milton <https://orcid.org/0000-0002-8510-6351>

349 Jennifer McIntosh <https://orcid.org/0000-0002-6655-0940>

350 Thivagar Yogaparan <https://orcid.org/0000-0003-3840-2999>

351 Pavithran Alphonse <https://orcid.org/0000-0003-3840-2999>

352 Sibel Saya <https://orid.org/0000-0002-4796-6852>

353 Peter Nguyen <https://orcid.org/0000-0002-8282-7663>

354 Phyllis Lau <https://orcid.org/0000-0002-0665-6348>

355 Jon Emery [0000-0002-5274-6336](https://orcid.org/0000-0002-5274-6336)

356 **Funding:** This project was funded by a dedicated grant from the Victorian Comprehensive Cancer  
357 Centre

358 **Competing interests:** JE and FM were members of the Cancer Council Australia guideline  
359 development group which recommends the use of low dose aspirin for the prevention of colorectal  
360 cancer.

361 **References**

- 362 1. Australian Institute of Health and Welfare. *Cancer in Australia. Cancer in Australia* (2019).  
363 doi:Cancer series no. 119. Cat. no. CAN123.
- 364 2. Chemopreventive candidate agents - Clinical Guidelines Wiki. Available at:  
365 [https://wiki.cancer.org.au/australia/Clinical\\_question:Aspirin\\_for\\_prevention\\_of\\_colorectal\\_ca](https://wiki.cancer.org.au/australia/Clinical_question:Aspirin_for_prevention_of_colorectal_cancer)  
366 ncer. (Accessed: 8th November 2019)
- 367 3. Rothwell, P. M. *et al.* Effect of daily aspirin on long-term risk of death due to cancer: analysis  
368 of individual patient data from randomised trials. *Lancet* **377**, 31–41 (2011).
- 369 4. Aspirin in the primary and secondary prevention of vascular disease: collaborative meta-  
370 analysis of individual participant data from randomised trials. *Lancet* **373**, 1849–1860 (2009).
- 371 5. CFIR Booklet. Available at: [http://cfirwiki.net/guide/app/index.html#/guide\\_select](http://cfirwiki.net/guide/app/index.html#/guide_select). (Accessed:  
372 7th November 2019)
- 373 6. Constructs | The Consolidated Framework for Implementation Research. Available at:  
374 <https://cfirguide.org/constructs/>. (Accessed: 8th November 2019)
- 375 7. Buy NVivo Now | NVivo. Available at: [https://www.qsrinternational.com/nvivo/nvivo-](https://www.qsrinternational.com/nvivo/nvivo-products/nvivo-12-plus)  
376 products/nvivo-12-plus. (Accessed: 8th November 2019)
- 377 8. McNeil, J. J. *et al.* Effect of Aspirin on Disability-free Survival in the Healthy Elderly. *N.*  
378 *Engl. J. Med.* **379**, 1499–1508 (2018).
- 379 9. Mcneil, J. J. *et al.* Medical Sciences cite as. *J Gerontol A Biol Sci Med Sci* **72**, 1586–1593  
380 (2017).
- 381 10. Kredo, T. *et al.* Guide to clinical practice guidelines: the current state of play. *Int. J. Qual.*  
382 *Heal. Care* **28**, 122–128 (2016).

Current formatting for publication in BMJ Open

- 1  
2  
3 383 11. Guide to the development, evaluation and implementation of clinical practice guidelines |  
4 384 NHMRC. Available at: [https://www.nhmrc.gov.au/about-us/publications/guide-development-  
6 evaluation-and-implementation-clinical-practice-guidelines](https://www.nhmrc.gov.au/about-us/publications/guide-development-<br/>5 385 evaluation-and-implementation-clinical-practice-guidelines). (Accessed: 1st April 2020)  
7 386 12. Buchan, H. A., Currie, K. C., Lourey, E. J. & Duggan, G. R. Australian clinical practice  
8 387 guidelines — a national study. *Med. J. Aust.* **192**, 490–494 (2010).  
9  
10 388 13. Jiang, V., Brooks, E. M., Tong, S. T., Heintzman, J. & Krist, A. H. Factors Influencing Uptake  
11 389 of Changes to Clinical Preventive Guidelines. *J. Am. Board Fam. Med.* **33**, 271–278  
12 390 (2020).  
13  
14 391 14. Raz, D. J. *et al.* Perceptions and utilization of lung cancer screening among primary care  
15 392 physicians. *J. Thorac. Oncol.* **11**, 1856–1862 (2016).  
16  
17 393 15. Turner, S. *et al.* Evidence use in decision-making on introducing innovations: A systematic  
18 394 scoping review with stakeholder feedback. *Implementation Science* **12**, 145 (2017).  
19  
20 395 16. Aspirin in the primary and secondary prevention of vascular disease: collaborative meta-  
21 396 analysis of individual participant data from randomised trials. *Lancet* **373**, 1849–1860 (2009).  
22  
23 397 17. Bibbins-Domingo, K. *et al.* Aspirin use for the primary prevention of cardiovascular disease  
24 398 and colorectal cancer: U.S. preventive services task force recommendation statement. *Annals  
25 399 of Internal Medicine* **164**, 836–845 (2016).  
26  
27 400 18. Stacey, D. *et al.* Decision aids for people facing health treatment or screening decisions.  
28 401 *Cochrane Database Syst. Rev.* (2017). doi:10.1002/14651858.CD001431.pub5  
29  
30 402 19. Nguyen, P. *et al.* Benefits and harms of aspirin to reduce colorectal cancer risk: A cross-  
31 403 sectional study of methods to communicate risk in primary care. *Br. J. Gen. Pract.* **69**, E843–  
32 404 E849 (2019).  
33  
34 405 20. Jiang, V., Brooks, E. M., Tong, S. T., Heintzman, J. & Krist, A. H. Factors Influencing Uptake  
35 406 of Changes to Clinical Preventive Guidelines. doi:10.3122/jabfm.2020.02.190146  
36  
37  
38  
39  
40  
41  
42  
43  
44  
45  
46  
47  
48  
49  
50  
51  
52  
53  
54  
55  
56  
57  
58  
59  
60

## COREQ (CONsolidated criteria for REporting Qualitative research) Checklist

A checklist of items that should be included in reports of qualitative research. You must report the page number in your manuscript where you consider each of the items listed in this checklist. If you have not included this information, either revise your manuscript accordingly before submitting or note N/A.

| Topic                                          | Item No. | Guide Questions/Description                                                                                                                              | Reported on Page No. |
|------------------------------------------------|----------|----------------------------------------------------------------------------------------------------------------------------------------------------------|----------------------|
| <b>Domain 1: Research team and reflexivity</b> |          |                                                                                                                                                          |                      |
| <i>Personal characteristics</i>                |          |                                                                                                                                                          |                      |
| Interviewer/facilitator                        | 1        | Which author/s conducted the interview or focus group?                                                                                                   |                      |
| Credentials                                    | 2        | What were the researcher's credentials? E.g. PhD, MD                                                                                                     |                      |
| Occupation                                     | 3        | What was their occupation at the time of the study?                                                                                                      |                      |
| Gender                                         | 4        | Was the researcher male or female?                                                                                                                       |                      |
| Experience and training                        | 5        | What experience or training did the researcher have?                                                                                                     |                      |
| <i>Relationship with participants</i>          |          |                                                                                                                                                          |                      |
| Relationship established                       | 6        | Was a relationship established prior to study commencement?                                                                                              |                      |
| Participant knowledge of the interviewer       | 7        | What did the participants know about the researcher? e.g. personal goals, reasons for doing the research                                                 |                      |
| Interviewer characteristics                    | 8        | What characteristics were reported about the interviewer/facilitator? e.g. Bias, assumptions, reasons and interests in the research topic                |                      |
| <b>Domain 2: Study design</b>                  |          |                                                                                                                                                          |                      |
| <i>Theoretical framework</i>                   |          |                                                                                                                                                          |                      |
| Methodological orientation and Theory          | 9        | What methodological orientation was stated to underpin the study? e.g. grounded theory, discourse analysis, ethnography, phenomenology, content analysis |                      |
| <i>Participant selection</i>                   |          |                                                                                                                                                          |                      |
| Sampling                                       | 10       | How were participants selected? e.g. purposive, convenience, consecutive, snowball                                                                       |                      |
| Method of approach                             | 11       | How were participants approached? e.g. face-to-face, telephone, mail, email                                                                              |                      |
| Sample size                                    | 12       | How many participants were in the study?                                                                                                                 |                      |
| Non-participation                              | 13       | How many people refused to participate or dropped out? Reasons?                                                                                          |                      |
| <i>Setting</i>                                 |          |                                                                                                                                                          |                      |
| Setting of data collection                     | 14       | Where was the data collected? e.g. home, clinic, workplace                                                                                               |                      |
| Presence of non-participants                   | 15       | Was anyone else present besides the participants and researchers?                                                                                        |                      |
| Description of sample                          | 16       | What are the important characteristics of the sample? e.g. demographic data, date                                                                        |                      |
| <i>Data collection</i>                         |          |                                                                                                                                                          |                      |
| Interview guide                                | 17       | Were questions, prompts, guides provided by the authors? Was it pilot tested?                                                                            |                      |
| Repeat interviews                              | 18       | Were repeat interviews carried out? If yes, how many?                                                                                                    |                      |
| Audio/visual recording                         | 19       | Did the research use audio or visual recording to collect the data?                                                                                      |                      |
| Field notes                                    | 20       | Were field notes made during and/or after the interview or focus group?                                                                                  |                      |
| Duration                                       | 21       | What was the duration of the interviews or focus group?                                                                                                  |                      |
| Data saturation                                | 22       | Was data saturation discussed?                                                                                                                           |                      |
| Transcripts returned                           | 23       | Were transcripts returned to participants for comment and/or                                                                                             |                      |



| Topic                                  | Item No. | Guide Questions/Description                                                                                                        | Reported on Page No. |
|----------------------------------------|----------|------------------------------------------------------------------------------------------------------------------------------------|----------------------|
|                                        |          | correction?                                                                                                                        |                      |
| <b>Domain 3: analysis and findings</b> |          |                                                                                                                                    |                      |
| <i>Data analysis</i>                   |          |                                                                                                                                    |                      |
| Number of data coders                  | 24       | How many data coders coded the data?                                                                                               |                      |
| Description of the coding tree         | 25       | Did authors provide a description of the coding tree?                                                                              |                      |
| Derivation of themes                   | 26       | Were themes identified in advance or derived from the data?                                                                        |                      |
| Software                               | 27       | What software, if applicable, was used to manage the data?                                                                         |                      |
| Participant checking                   | 28       | Did participants provide feedback on the findings?                                                                                 |                      |
| <i>Reporting</i>                       |          |                                                                                                                                    |                      |
| Quotations presented                   | 29       | Were participant quotations presented to illustrate the themes/findings?<br>Was each quotation identified? e.g. participant number |                      |
| Data and findings consistent           | 30       | Was there consistency between the data presented and the findings?                                                                 |                      |
| Clarity of major themes                | 31       | Were major themes clearly presented in the findings?                                                                               |                      |
| Clarity of minor themes                | 32       | Is there a description of diverse cases or discussion of minor themes?                                                             |                      |

Developed from: Tong A, Sainsbury P, Craig J. Consolidated criteria for reporting qualitative research (COREQ): a 32-item checklist for interviews and focus groups. *International Journal for Quality in Health Care*. 2007. Volume 19, Number 6: pp. 349 – 357

**Once you have completed this checklist, please save a copy and upload it as part of your submission. DO NOT include this checklist as part of the main manuscript document. It must be uploaded as a separate file.**

SPQR checklist for Clinicians' opinions on recommending aspirin to prevent colorectal cancer to Australians aged 50 to 70 years: a qualitative study

### Standards for Reporting Qualitative Research (SRQR)\*

<http://www.equator-network.org/reporting-guidelines/srqr/>

Page/line no(s).

#### Title and abstract

|                                                                                                                                                                                                                                                              |                    |
|--------------------------------------------------------------------------------------------------------------------------------------------------------------------------------------------------------------------------------------------------------------|--------------------|
| <p><b>Title</b> - Concise description of the nature and topic of the study Identifying the study as qualitative or indicating the approach (e.g., ethnography, grounded theory) or data collection methods (e.g., interview, focus group) is recommended</p> | Page 1/ line 1-3   |
| <p><b>Abstract</b> - Summary of key elements of the study using the abstract format of the intended publication; typically includes background, purpose, methods, results, and conclusions</p>                                                               | Page 2/ line 35-62 |

#### Introduction

|                                                                                                                                                                     |                    |
|---------------------------------------------------------------------------------------------------------------------------------------------------------------------|--------------------|
| <p><b>Problem formulation</b> - Description and significance of the problem/phenomenon studied; review of relevant theory and empirical work; problem statement</p> | Page 3/ line 75-90 |
| <p><b>Purpose or research question</b> - Purpose of the study and specific objectives or questions</p>                                                              | Page 3/ line 91-94 |

#### Methods

|                                                                                                                                                                                                                                                                                                                                                                                                             |                                     |
|-------------------------------------------------------------------------------------------------------------------------------------------------------------------------------------------------------------------------------------------------------------------------------------------------------------------------------------------------------------------------------------------------------------|-------------------------------------|
| <p><b>Qualitative approach and research paradigm</b> - Qualitative approach (e.g., ethnography, grounded theory, case study, phenomenology, narrative research) and guiding theory if appropriate; identifying the research paradigm (e.g., postpositivist, constructivist/ interpretivist) is also recommended; rationale**</p>                                                                            | Page 3/ line 99<br>Page 3/ line 100 |
| <p><b>Researcher characteristics and reflexivity</b> - Researchers' characteristics that may influence the research, including personal attributes, qualifications/experience, relationship with participants, assumptions, and/or presuppositions; potential or actual interaction between researchers' characteristics and the research questions, approach, methods, results, and/or transferability</p> | Page 4/ lines 120 - 126             |
| <p><b>Context</b> - Setting/site and salient contextual factors; rationale**</p>                                                                                                                                                                                                                                                                                                                            | Page 3/ line 105                    |
| <p><b>Sampling strategy</b> - How and why research participants, documents, or events were selected; criteria for deciding when no further sampling was necessary (e.g., sampling saturation); rationale**</p>                                                                                                                                                                                              | Page 3/ line 104                    |
| <p><b>Ethical issues pertaining to human subjects</b> - Documentation of approval by an appropriate ethics review board and participant consent, or explanation for lack thereof; other confidentiality and data security issues</p>                                                                                                                                                                        | Page 10 / line 345 - 347            |

|                        |                                                                                                                                                                                                                                                                                                                          |                                    |
|------------------------|--------------------------------------------------------------------------------------------------------------------------------------------------------------------------------------------------------------------------------------------------------------------------------------------------------------------------|------------------------------------|
| 1<br>2<br>3<br>4<br>5  | <b>Data collection methods</b> - Types of data collected; details of data collection procedures including (as appropriate) start and stop dates of data collection and analysis, iterative process, triangulation of sources/methods, and modification of procedures in response to evolving study findings; rationale** | Page 3/ line 113                   |
| 6<br>7<br>8<br>9<br>10 | <b>Data collection instruments and technologies</b> - Description of instruments (e.g., interview guides, questionnaires) and devices (e.g., audio recorders) used for data collection; if/how the instrument(s) changed over the course of the study                                                                    | Page 4/ line 126                   |
| 11<br>12<br>13         | <b>Units of study</b> - Number and relevant characteristics of participants, documents, or events included in the study; level of participation (could be reported in results)                                                                                                                                           | Page 5/ line 143 and line 151      |
| 14<br>15<br>16<br>17   | <b>Data processing</b> - Methods for processing data prior to and during analysis, including transcription, data entry, data management and security, verification of data integrity, data coding, and anonymization/de-identification of excerpts                                                                       | Page 4/ line 126                   |
| 18<br>19<br>20<br>21   | <b>Data analysis</b> - Process by which inferences, themes, etc., were identified and developed, including the researchers involved in data analysis; usually references a specific paradigm or approach; rationale**                                                                                                    | Page 4/ line 128-129/ line 131-138 |
| 22<br>23<br>24<br>25   | <b>Techniques to enhance trustworthiness</b> - Techniques to enhance trustworthiness and credibility of data analysis (e.g., member checking, audit trail, triangulation); rationale**                                                                                                                                   | Page 4/ line 134- 135              |

## Results/findings

|                                  |                                                                                                                                                                                                   |                          |
|----------------------------------|---------------------------------------------------------------------------------------------------------------------------------------------------------------------------------------------------|--------------------------|
| 26<br>27<br>28<br>29<br>30<br>31 | <b>Synthesis and interpretation</b> - Main findings (e.g., interpretations, inferences, and themes); might include development of a theory or model, or integration with prior research or theory | Page 5-8/ line 143 - 280 |
| 32<br>33<br>34                   | <b>Links to empirical data</b> - Evidence (e.g., quotes, field notes, text excerpts, photographs) to substantiate analytic findings                                                               | Page 5-8/ line 143 - 280 |

## Discussion

|                                                    |                                                                                                                                                                                                                                                                                                                                                                                                             |                           |
|----------------------------------------------------|-------------------------------------------------------------------------------------------------------------------------------------------------------------------------------------------------------------------------------------------------------------------------------------------------------------------------------------------------------------------------------------------------------------|---------------------------|
| 35<br>36<br>37<br>38<br>39<br>40<br>41<br>42<br>43 | <b>Integration with prior work, implications, transferability, and contribution(s) to the field</b> - Short summary of main findings; explanation of how findings and conclusions connect to, support, elaborate on, or challenge conclusions of earlier scholarship; discussion of scope of application/generalizability; identification of unique contribution(s) to scholarship in a discipline or field | Page 8- 9/ line 282 - 327 |
| 44<br>45                                           | <b>Limitations</b> - Trustworthiness and limitations of findings                                                                                                                                                                                                                                                                                                                                            | Page 9/ line 334 - 340    |

## Other

|                            |                                                                                                                                               |                         |
|----------------------------|-----------------------------------------------------------------------------------------------------------------------------------------------|-------------------------|
| 46<br>47<br>48<br>49<br>50 | <b>Conflicts of interest</b> - Potential sources of influence or perceived influence on study conduct and conclusions; how these were managed | Page 10/ line 359 - 361 |
| 51<br>52<br>53             | <b>Funding</b> - Sources of funding and other support; role of funders in data collection, interpretation, and reporting                      | Page 10/ line 357 - 358 |

# BMJ Open

## Clinicians' opinions on recommending aspirin to prevent colorectal cancer to Australians aged 50 to 70 years: a qualitative study

|                                 |                                                                                                                                                                                                                                                                                                                                                                                                                                                                                                                                                                                                                                                                                                                                                                                                                                                                                                                                                                                                                                                                                                                                                                                                                                                                                                                                                                                                                                                                                                                                                                                                                                                                                                                                                                                                                                                                          |
|---------------------------------|--------------------------------------------------------------------------------------------------------------------------------------------------------------------------------------------------------------------------------------------------------------------------------------------------------------------------------------------------------------------------------------------------------------------------------------------------------------------------------------------------------------------------------------------------------------------------------------------------------------------------------------------------------------------------------------------------------------------------------------------------------------------------------------------------------------------------------------------------------------------------------------------------------------------------------------------------------------------------------------------------------------------------------------------------------------------------------------------------------------------------------------------------------------------------------------------------------------------------------------------------------------------------------------------------------------------------------------------------------------------------------------------------------------------------------------------------------------------------------------------------------------------------------------------------------------------------------------------------------------------------------------------------------------------------------------------------------------------------------------------------------------------------------------------------------------------------------------------------------------------------|
| Journal:                        | <i>BMJ Open</i>                                                                                                                                                                                                                                                                                                                                                                                                                                                                                                                                                                                                                                                                                                                                                                                                                                                                                                                                                                                                                                                                                                                                                                                                                                                                                                                                                                                                                                                                                                                                                                                                                                                                                                                                                                                                                                                          |
| Manuscript ID                   | bmjopen-2020-042261.R1                                                                                                                                                                                                                                                                                                                                                                                                                                                                                                                                                                                                                                                                                                                                                                                                                                                                                                                                                                                                                                                                                                                                                                                                                                                                                                                                                                                                                                                                                                                                                                                                                                                                                                                                                                                                                                                   |
| Article Type:                   | Original research                                                                                                                                                                                                                                                                                                                                                                                                                                                                                                                                                                                                                                                                                                                                                                                                                                                                                                                                                                                                                                                                                                                                                                                                                                                                                                                                                                                                                                                                                                                                                                                                                                                                                                                                                                                                                                                        |
| Date Submitted by the Author:   | 28-Nov-2020                                                                                                                                                                                                                                                                                                                                                                                                                                                                                                                                                                                                                                                                                                                                                                                                                                                                                                                                                                                                                                                                                                                                                                                                                                                                                                                                                                                                                                                                                                                                                                                                                                                                                                                                                                                                                                                              |
| Complete List of Authors:       | Milton, Shakira; The University of Melbourne Faculty of Medicine Dentistry and Health Sciences, Department of General Practice; The University of Melbourne - Parkville Campus, Centre for Cancer Research<br>McIntosh, Jennifer; Monash University, Department of Software Systems & Cybersecurity; The University of Melbourne Faculty of Medicine Dentistry and Health Sciences, Department of General Practice<br>Yogaparan, Thivagar; The University of Melbourne Faculty of Medicine Dentistry and Health Sciences, Department of General Practice; The University of Melbourne - Parkville Campus, Centre for Cancer Research<br>Alphonse, Pavithran; The University of Melbourne - Parkville Campus, Centre for Cancer Research; The University of Melbourne Faculty of Medicine Dentistry and Health Sciences, Department of General Practice<br>Saya, Sibel; The University of Melbourne, Department of General Practice; The University of Melbourne Faculty of Medicine Dentistry and Health Sciences, Department of General Practice<br>Karnchanachari, Napin; The University of Melbourne - Parkville Campus, Centre for Cancer Research; The University of Melbourne Faculty of Medicine Dentistry and Health Sciences, Department of General Practice<br>Nguyen, Peter; The University of Melbourne - Parkville Campus, Centre for Cancer Research; The University of Melbourne Faculty of Medicine Dentistry and Health Sciences, Department of General Practice<br>Lau, Phyllis; The University of Melbourne Faculty of Medicine Dentistry and Health Sciences, Department of General Practice<br>Macrae, Finlay; Royal Melbourne Hospital, Colorectal Medicine and Genetics<br>Emery, Jon; The University of Melbourne Faculty of Medicine Dentistry and Health Sciences, Department of General Practice; Cambridge University, The Primary Care Unit |
| <b>Primary Subject Heading</b>: | Qualitative research                                                                                                                                                                                                                                                                                                                                                                                                                                                                                                                                                                                                                                                                                                                                                                                                                                                                                                                                                                                                                                                                                                                                                                                                                                                                                                                                                                                                                                                                                                                                                                                                                                                                                                                                                                                                                                                     |
| Secondary Subject Heading:      | Oncology, Public health, Patient-centred medicine                                                                                                                                                                                                                                                                                                                                                                                                                                                                                                                                                                                                                                                                                                                                                                                                                                                                                                                                                                                                                                                                                                                                                                                                                                                                                                                                                                                                                                                                                                                                                                                                                                                                                                                                                                                                                        |
| Keywords:                       | GENERAL MEDICINE (see Internal Medicine), Gastroenterology < INTERNAL MEDICINE, Epidemiology < ONCOLOGY, PREVENTIVE MEDICINE, PRIMARY CARE, QUALITATIVE RESEARCH                                                                                                                                                                                                                                                                                                                                                                                                                                                                                                                                                                                                                                                                                                                                                                                                                                                                                                                                                                                                                                                                                                                                                                                                                                                                                                                                                                                                                                                                                                                                                                                                                                                                                                         |
|                                 |                                                                                                                                                                                                                                                                                                                                                                                                                                                                                                                                                                                                                                                                                                                                                                                                                                                                                                                                                                                                                                                                                                                                                                                                                                                                                                                                                                                                                                                                                                                                                                                                                                                                                                                                                                                                                                                                          |

1  
2  
3  
4  
5  
6  
7  
8  
9  
10  
11  
12  
13  
14  
15  
16  
17  
18  
19  
20  
21  
22  
23  
24  
25  
26  
27  
28  
29  
30  
31  
32  
33  
34  
35  
36  
37  
38  
39  
40  
41  
42  
43  
44  
45  
46  
47  
48  
49  
50  
51  
52  
53  
54  
55  
56  
57  
58  
59  
60

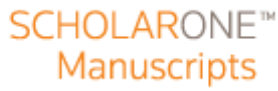



I, the Submitting Author has the right to grant and does grant on behalf of all authors of the Work (as defined in the below author licence), an exclusive licence and/or a non-exclusive licence for contributions from authors who are: i) UK Crown employees; ii) where BMJ has agreed a CC-BY licence shall apply, and/or iii) in accordance with the terms applicable for US Federal Government officers or employees acting as part of their official duties; on a worldwide, perpetual, irrevocable, royalty-free basis to BMJ Publishing Group Ltd ("BMJ") its licensees and where the relevant Journal is co-owned by BMJ to the co-owners of the Journal, to publish the Work in this journal and any other BMJ products and to exploit all rights, as set out in our [licence](#).

The Submitting Author accepts and understands that any supply made under these terms is made by BMJ to the Submitting Author unless you are acting as an employee on behalf of your employer or a postgraduate student of an affiliated institution which is paying any applicable article publishing charge ("APC") for Open Access articles. Where the Submitting Author wishes to make the Work available on an Open Access basis (and intends to pay the relevant APC), the terms of reuse of such Open Access shall be governed by a Creative Commons licence – details of these licences and which [Creative Commons](#) licence will apply to this Work are set out in our licence referred to above.

Other than as permitted in any relevant BMJ Author's Self Archiving Policies, I confirm this Work has not been accepted for publication elsewhere, is not being considered for publication elsewhere and does not duplicate material already published. I confirm all authors consent to publication of this Work and authorise the granting of this licence.

Current formatting for publication in BMJ Open

# Clinicians' opinions on recommending aspirin to prevent colorectal cancer to Australians aged 50 to 70 years: a qualitative study

Shakira Milton<sup>1,2</sup>, Jennifer McIntosh<sup>2,3</sup>, Thivagar Yogaparan<sup>1,2</sup>, Pavithran Alphonse<sup>1,2</sup>, Sibel Saya<sup>1,2</sup>, Napin Karnchanachari<sup>1,2</sup>, Peter Nguyen<sup>1,2</sup>, Phyllis Lau<sup>2</sup>, Finlay Macrae<sup>4,5</sup>, Jon Emery<sup>1,2,6</sup>

## Author Affiliations

1. Centre for Cancer Research, University of Melbourne, Melbourne, Australia
2. Department of General Practice, University of Melbourne, Melbourne, Australia
3. Department of Software Systems & Cybersecurity, Monash University, Melbourne, Australia
4. Department of Medicine, The University of Melbourne, Melbourne
5. Colorectal Medicine and Genetics, The Royal Melbourne Hospital, Melbourne, Australia
6. The Primary Care Unit, University of Cambridge, Cambridge, United Kingdom

## Author's email addresses:

|                                                                                  |                                                                                          |
|----------------------------------------------------------------------------------|------------------------------------------------------------------------------------------|
| <a href="mailto:shakira.milton@unimelb.edu.au">shakira.milton@unimelb.edu.au</a> | <a href="mailto:jenny.mcintosh@monash.edu">jenny.mcintosh@monash.edu</a>                 |
| <a href="mailto:thivagaryogaparan@gmail.com">thivagaryogaparan@gmail.com</a>     | <a href="mailto:p.alphonse@student.unimelb.edu.au">p.alphonse@student.unimelb.edu.au</a> |
| <a href="mailto:sibel.saya@unimelb.edu.au">sibel.saya@unimelb.edu.au</a>         | <a href="mailto:napin@unimelb.edu.au">napin@unimelb.edu.au</a>                           |
| <a href="mailto:peter.nguyen2@unimelb.edu.au">peter.nguyen2@unimelb.edu.au</a>   | <a href="mailto:plau@unimelb.edu.au">plau@unimelb.edu.au</a>                             |
| <a href="mailto:finlay.macrae@mh.org.au">finlay.macrae@mh.org.au</a>             | <a href="mailto:jon.emery@unimelb.edu.au">jon.emery@unimelb.edu.au</a>                   |

## Corresponding author:

Shakira Milton  
Centre for Cancer Research  
Level 10, 305 Grattan Street  
Melbourne, VIC 3000  
E: [shakira.milton@unimelb.edu.au](mailto:shakira.milton@unimelb.edu.au)  
T: +61 3 85597085

**Acknowledgements:** The authors would like to acknowledge Primary Care Collaborative Cancer Clinical Trials Group (PC4) for supporting this project.

**Keywords:** Preventative medicine, General practice, Primary care, Cancer prevention, Bowel cancer, Aspirin, Guideline implementation, Chemoprevention

**Word Count:** 4,067

Current formatting for publication in BMJ Open

## 34 Abstract

### 35 Objectives

36 Australian guidelines recommend all 50 to 70-year-olds without existing contraindications consider  
37 taking low-dose aspirin (100 mg – 300 mg per day) for at least 2.5 years to reduce their risk of  
38 developing colorectal cancer.

39 We aimed to explore clinicians', practices, knowledge, opinions, and barriers and facilitators to the  
40 implementation of these new guidelines.

### 41 Methods

42 Semi-structured interviews were conducted with clinicians to whom the new guidelines may be  
43 applicable (familial cancer clinic staff (geneticists, oncologists and genetic counsellors),  
44 gastroenterologists, pharmacists, and general practitioners (GPs)).

45 The Consolidated Framework for Implementation Research (CFIR) underpinned the development of  
46 the interview guide. Coding was inductive and themes were developed through consensus between the  
47 authors.

48 Emerging themes were mapped onto the CFIR domains: characteristics of the intervention, outer  
49 setting, inner setting, individual characteristics and process.

### 50 Results

51 Sixty-four interviews were completed between March and October 2019. Aspirin was viewed as a  
52 safe and cheap option for cancer prevention. GPs were considered by all clinicians as the most  
53 important health professionals for implementation of the guidelines. Cancer Council Australia, as a  
54 trusted organisation, was an important facilitator to guideline adoption. Uncertainty about aspirin  
55 dosage and perceived strength of the evidence, precise wording of the recommendation, previous  
56 changes to guidelines about aspirin, and conflicting findings from trials in older populations were  
57 barriers to implementation.

### 58 Conclusion

59 Widespread adoption of these new guidelines could be an important strategy to reduce the incidence  
60 of bowel cancer, but this will require more active implementation strategies focused on primary care  
61 and the wider community.

### 62 Strengths and limitations of this study

63 Up to five short bullet points, no longer than one sentence each, that relate specifically to the methods.  
64 They should not include the results of the study.

- 65 • We recruited a large and diverse group of participants representing different clinical  
66 disciplines, varied length of experience, and work settings.
- 67 • We applied an established theoretical framework to study guideline implementation
- 68 • We recruited participants only from one state, Victoria, but we believe our findings are likely  
69 to be transferable to other Australian clinicians
- 70 • We acknowledge that there may be other barriers and facilitators experienced by clinicians  
71 from remote locations.

72



Current formatting for publication in BMJ Open

## 73 Introduction

74 In 2019, colorectal cancer (CRC) was the second most commonly diagnosed cancer in Australia in  
75 men and women (9,069 cases and 7,329 cases, respectively).<sup>1</sup> In November 2017, Cancer Council  
76 Australia updated their guidelines for the prevention of CRC to recommend that all people aged 50-70  
77 who are at average risk of CRC actively consider taking low-dose aspirin to reduce their risk of CRC.<sup>2</sup>  
78 Despite the publication of these national guidelines recommending a significant change in CRC  
79 prevention strategy, it has not been accompanied by an implementation strategy, rather relying on  
80 passive diffusion of the guidelines into clinical practice.

81 The new guidelines were endorsed by the National Health and Medical Research Council (NHMRC)  
82 and adopted by the Royal Australian College of General Practitioners (RACGP). Meta-analyses of  
83 randomised controlled trials of low-dose aspirin have demonstrated reduced incidence and mortality  
84 from colorectal cancer by 25% and 33% respectively, as well as a 33% reduction in all-cause cancer  
85 mortality, when taken for at least 2.5 years.<sup>3</sup> In addition to reducing the risk of colorectal cancer,  
86 aspirin also reduces the risk of cardiovascular disease (CVD) including myocardial infarctions,  
87 ischaemic strokes and transient ischaemic attacks by 6% per annum in primary prevention trials<sup>4</sup>  
88 However, aspirin can cause side-effects including gastrointestinal haemorrhage, peptic ulcer and  
89 haemorrhagic stroke.

90 This project aimed to explore clinicians', practices, knowledge, opinions, and barriers and facilitators  
91 to the implementation of these guidelines, with the intention of developing implementation methods  
92 to increase the uptake of aspirin for CVD and CRC prevention, and reduce development of colorectal  
93 cancer in the Australian population.

## 94 Methods

### 95 Approach

96 A qualitative case study using semi-structured interviews was conducted with a range of health  
97 professionals whom the new guidelines were most likely to directly impact, including  
98 gastroenterologists, geneticists, oncologists, genetic counsellors and general practitioners. A  
99 constructivist paradigm was used to generate new ideas from participants, using interviews to explore  
100 current practice, knowledge and opinions toward recommending aspirin to people at average risk of  
101 CRC and potential barriers and facilitators to implementing the guidelines.

### 102 Setting and sampling strategy

103 Recruitment was done through personal networks of the authors, as well as snowball sampling  
104 through social media posts, emailing through the Familial Cancer Centre (FCC) staff email list in the  
105 Parkville Precinct and cold calling general practices through the University of Melbourne's  
106 Department of General Practice Victorian Research and Education Network database. From these  
107 different sources of participants, we purposively sampled to achieve maximum variation in profession  
108 type, age, gender, years of experience and those working in both rural and urban Victoria, and public  
109 and private practice settings. As we sent out recruitment messages through different sources all  
110 participants opted in on their own. All participants provided written consent. General practitioners, as  
111 private practitioners, were reimbursed \$100 for their time as this group was the most difficult to  
112 recruit. Recruitment of all participants occurred between February and September 2019.

### 113 Data collection techniques

114 A semi-structured interview guide was developed based on the Consolidated Framework for  
115 Implementation Research (CFIR)<sup>5</sup> (Table 1). CFIR is a conceptual framework developed to guide the  
116 assessment of implementation contexts. It consists of five domains and 39 constructs representing all  
117 areas of a healthcare setting that impact upon the successful implementation of a new intervention.<sup>6</sup>  
118 The five overarching CFIR domains covers aspects of the design and cost of the intervention

Current formatting for publication in BMJ Open

119 characteristics, aspects of organisations and how they operate in the inner setting, individuals within  
 120 the organisations or characteristics of individuals like the culture and leadership, how outside  
 121 organisations or outer settings and beliefs, and implementation processes impact upon successful  
 122 implementation of an intervention.

123 The interview questions were adapted from the online CFIR guide, which provides a list of potentially  
 124 relevant interview questions for each of the constructs.<sup>5</sup> In this study, the ‘intervention’ was defined as  
 125 the national guideline recommending consideration of aspirin for CRC prevention. [Supplementary  
 126 Section 1].

127 The interviews were conducted by three researchers by authors SM, PA and TY who had no existing  
 128 relationships with the participants. The interviewing researchers disclosed their position in the  
 129 research to the participants and they were aware why the research was being conducted. Researcher  
 130 SM who interviewed the general practitioners, geneticists, oncologists and genetic counsellors is a  
 131 highly experienced female qualitative researcher. Researchers PA who interviewed pharmacists and  
 132 TY who interviewed gastroenterologists both were male students who were trained in qualitative  
 133 methods and supervised by experienced qualitative researchers (SM, JM, JE). Interviews were audio  
 134 recorded and transcribed verbatim. Field notes on the time and location were recorded in researchers’  
 135 notebook following the interviews. Researchers met regularly to review the interview transcripts and  
 136 discuss data and the emerging themes. Interview transcripts were not returned to participants.

137 **Analysis**

138 Qualitative transcript data were managed using NVivo 12<sup>7</sup>. The interviews for each type of  
 139 participant; FCC staff, GPs, gastroenterologists and pharmacists were initially analysed separately.  
 140 Complete coding of each interview was conducted by the author who interviewed the participant  
 141 where everything that was spoken by the participants was organised into specific topics. At the first  
 142 level of coding codes were produced inductively for each of the participant professional groups upon  
 143 completion. For enhanced interpretive rigour, several interviews in each participant group were co-  
 144 coded by another researcher and progressively checked in regular researcher meetings. The coding for  
 145 several interviews per participant type was checked by a second researcher.

146 After first-level coding, codes were grouped into themes. Thematic analysis was employed at this  
 147 level where themes emerged from the first-level coding through discussions between the researchers.  
 148 About 20 themes per professional group type were defined. Themes from each professional group  
 149 type were discussed between the researchers brought together if they could be. Themes were then  
 150 mapped onto the domain and constructs from the CFIR<sup>6</sup>: characteristics of intervention, outer setting,  
 151 inner setting, characteristics of individuals and process (Table 1).

152 *Table 1. Overview of the Consolidated Framework for Implementation Research. The CFIR provides constructs*  
 153 *that have been associated with effective implementation.*<sup>6</sup>

| <b>Characteristics of Intervention</b>                                                                                                                             | <b>Inner Setting</b>                                                                                   | <b>Outer Setting</b>                                                                                       | <b>Individuals Involved</b>                                                                                                                                                       | <b>Implementation Process</b>                                          |
|--------------------------------------------------------------------------------------------------------------------------------------------------------------------|--------------------------------------------------------------------------------------------------------|------------------------------------------------------------------------------------------------------------|-----------------------------------------------------------------------------------------------------------------------------------------------------------------------------------|------------------------------------------------------------------------|
| - Intervention source<br>- Evidence strength and quality<br>- Relative advantage<br>- Adaptability<br>- Trialability<br>- Complexity<br>- Design quality<br>- Cost | - Structural characteristics<br>- Networks and communications<br>- Culture<br>- Implementation climate | - Patient needs and resources<br>-Cosmopolitanism<br>- Peer pressure<br>- External policies and incentives | - Knowledge and beliefs about the intervention<br>- Self-efficacy<br>- Individual stage of change<br>- Individual identification with organisation<br>- Other personal attributes | - Planning<br>- Engaging<br>- Executing<br>- Reflecting and evaluating |

Current formatting for publication in BMJ Open

154 **Patient and public involvement**

155 No patient involvement.

156 **Results**

157 Sixty-four participants were interviewed (Table 2). Interviews ranged from 20-50 minutes and were  
 158 face-to-face in the participants place of work (clinic, pharmacy or hospital consulting or meeting  
 159 room), except for four GPs who were interviewed over the phone. The researcher and participants  
 160 were the only ones present during the interviews, except for with pharmacists if there were  
 161 shopkeepers or pharmacy assistants present. The results are presented according to the domains of  
 162 CFIR (Table 3).

163 *Table 2. Characteristics of participants.*

| Characteristics                                  |  |    |
|--------------------------------------------------|--|----|
| Mean age (years)                                 |  | 41 |
| Sex, female (n)                                  |  | 35 |
| Profession (n)                                   |  |    |
| Gastroenterologist                               |  | 17 |
| Pharmacist                                       |  | 14 |
| General practitioner                             |  | 16 |
| Familial cancer on (FCC) staff                   |  |    |
| Genetic counsellor                               |  | 10 |
| Geneticists                                      |  | 4  |
| Oncologist                                       |  | 3  |
| Years in profession (n)                          |  |    |
| <10                                              |  | 23 |
| 10 – 19                                          |  | 22 |
| 20 – 29                                          |  | 8  |
| 30+                                              |  | 11 |
| Work setting                                     |  |    |
| General practice (%)                             |  |    |
| Bulk-billing clinic                              |  | 31 |
| Private                                          |  | 69 |
| Hospital (gastroenterologists and FCC staff) (%) |  |    |
| Public                                           |  | 77 |
| Private                                          |  | 23 |
| Pharmacy (%)                                     |  |    |
| Hospital                                         |  | 36 |
| Community                                        |  | 64 |

164

165

Current formatting for publication in BMJ Open

166 *Table 3. Results of themes from interviews with 64; general practitioners (GPs), gastroenterologists, familial cancer clinic*  
 167 *staff (FCC staff), and pharmacists mapped onto the Consolidated Framework for Implementation Research.*

| <b>Characteristics of Intervention</b>                                                                           | <b>Inner Setting</b>                                                                                                         | <b>Outer Setting</b>                                                                                                                                                | <b>Individuals Involved</b>                                                                                                 | <b>Implementation Process</b>                                                                                                           |
|------------------------------------------------------------------------------------------------------------------|------------------------------------------------------------------------------------------------------------------------------|---------------------------------------------------------------------------------------------------------------------------------------------------------------------|-----------------------------------------------------------------------------------------------------------------------------|-----------------------------------------------------------------------------------------------------------------------------------------|
| -The participants expressed confusion around the aspirin dosing (100-300 mg)                                     | - Participants agreed that having limited time would be a barrier to implementation as they are usually very busy            | - As the guidelines were first published by the Cancer Council Australia, they were more trustworthy                                                                | - Geneticists, pharmacists and gastroenterologists saw their role as advocates of the guidelines                            | - Participants thought of themselves as early adopters but agreed that it takes time for most clinicians to implement new interventions |
| -Some facilitators to aspirin implementation included; the low cost, availability and safety                     | - Pharmacists specifically saw their role to support what the GPs advise, and thought they should reiterate this to patients | - The ASPREE trial although it was a study done in the elderly (70 – 80-year-old) population, it introduced some hesitancy even for the 50 – 70-year-old population | - All clinicians agreed that it is GPs role to implement the guidelines into general practice, GPs agreed it was their role | - Participants agreed that patients would be receptive to the recommendations                                                           |
| -The ‘actively considered’ wording of the guidelines implied some uncertainty about the strength of the evidence |                                                                                                                              |                                                                                                                                                                     | - FCC staff were aware of the guidelines, but other clinicians had limited knowledge                                        | - A decision aid would be helpful in facilitating a discussion with patients                                                            |
| -The aspirin guidelines have changed over time which presents as a barrier to implementation                     |                                                                                                                              | - The guidelines have changed a lot over time for CVD                                                                                                               |                                                                                                                             |                                                                                                                                         |

168

## 1. Characteristics of the Intervention

### Aspirin

169 Many participants expressed confusion regarding the dose of aspirin recommended for colorectal  
 170 cancer prevention. While some participants were comfortable deciding on a dose within the 100 –  
 171 300mg range specified in the guidelines, others felt that this does range indicated uncertainty in the  
 172 guidelines. (Quotations 1a and 1b)

- 173 • 1a “Well I think the range is ambiguous there. The numbers are not ambiguous at all there I  
 174 suppose but it's just - it's out with normal practice I guess” General Practitioner, 30 years old
- 175 • 1b “And I think the risk in data coming out is how much is useful, like the dosage. We used to  
 176 think that a low dose used to be good for other cardiovascular events, but in fact maybe it  
 177 isn't depending on gender, age and weight.” Gastroenterologist, 47 years old

178 Aspirin was perceived as cheap, safe and readily available by many participants, who stated this  
 179 would facilitate their prescribing and patient uptake. With the rising costs of healthcare, participants  
 180 thought the cheap nature of aspirin facilitated the implementation of the guidelines. (Quotation 1c)  
 181 Barriers to implementation included concerns about possible side-effects of aspirin such as  
 182 gastrointestinal bleeding and contraindications in people with multiple comorbidities. (Quotation 1d)

- 183 • 1c “It's cheap, which is the other thing; and, again, in the Australian healthcare system,  
 184 where there are costs associated with a lot of treatments, to be able to recommend something  
 185 that is - we're saying safe, the exception being the gastric irritation, and effective, and it's not  
 186 going to break the bank for them to use it.” General practitioner, 62 years
- 187 • 1d “And in terms of weighing up the side effects from aspirin, we've got the issue of the  
 188 potential for those individuals who have got other comorbidities whether it's renal or

Current formatting for publication in BMJ Open

191 *allergies to aspirin or risk of stroke etc etc. You've got to weigh all those factors up before*  
 192 *you consider putting someone on aspirin" Gastroenterologist, 59 years old*

### 193 CCA guideline

194 Many participants mentioned the specific phrasing of the guidelines, namely that aspirin should be  
 195 "actively considered". This language did not sufficiently encourage them to prioritise the  
 196 recommendation, and implied uncertainty about the strength of evidence. (Quotation 1e)

- 197 • 1e *"Because it's not strong, also, perhaps that's something that will be its - not its downfall,*  
 198 *but will be negative because we already have a lot of strong guidelines" Geneticist, 32 years*  
 199 *old*

## 200 2. Inner Setting

201 Despite the variety of specialities and workplace types, a common theme emerged of competing  
 202 demands on clinicians' time limiting their capacity to discuss aspirin for the prevention of CRC.  
 203 (Quotations 2a, 2b) Pharmacists suggested they could support GPs in counselling patients, given GPs  
 204 have relatively short consultation times with their patients. Pharmacists commented on the closeness  
 205 of their location to GP clinics and their potential to reiterate advice about aspirin given by the GP.  
 206 (Quotation 2c)

- 207 • 2a *"I think time's our major challenge. There's just not enough time to... especially that the*  
 208 *pace that endoscopy list goes is fast and I think in private it's much faster. Public, even then;*  
 209 *even if it's not pace, the patients had an anaesthetic - it's not really an appropriate time to be*  
 210 *talking to them about long-term stuff." Gastroenterologist, 50 years old*
- 211 • 2b *"So we only actually see people when we can offer genetic testing and the rest of our work*  
 212 *is done over the phone or we send letters. We are absolutely flat out at the moment. This is*  
 213 *probably the only time today I will be sitting and not running around." Genetic counsellor, 35*  
 214 *years old*
- 215 • 2c *"I think, we should, way of promoting it, and probably we should be more proactive with*  
 216 *it, GPs tend to not... especially, one of the pharmacies I work at is next to a bulk billing clinic*  
 217 *doctors are very much get them in, get them out, and don't spend much time with them. so*  
 218 *that's where we can often come in to be that extra person that can either reinforce what the*  
 219 *doctor's told them or suggest other things. So, we should be there in the front line, yeah,*  
 220 *promoting health." Pharmacist, 50 years old*

## 222 3. Outer Setting

223 Cancer Council Australia was perceived as a trustworthy organisation and this gave greater weight to  
 224 and trust in the guidelines. (Quotation 3a)

- 225 • 3a *"Look as long as this is done by the Cancer Council of Victoria, I'm trusting them so it*  
 226 *depends who is it behind, but this is a credible source of information I would have hoped."*  
 227 *General Practitioner, 58 years old*

228 The initial results of the Aspirin in Reducing Events in the Elderly (ASPREE) Trial were published  
 229 after the Cancer Council Australia national clinical guidelines were released, and shortly before  
 230 interviews for this study were conducted.<sup>8</sup> The ASPREE trial showed low-dose aspirin provided no  
 231 benefit in participants aged 70-80 years over a short-term follow up of 4.7 years.<sup>9</sup> Some participants  
 232 in our study, despite varying degrees of knowledge of the ASPREE trial results, were hesitant to  
 233 recommend aspirin for people even in the 50 to 70-year-old group covered by the guidelines, due to  
 234 the findings of the ASPREE trial despite being conducted in a different age cohort. (Quotations 3b  
 235 and 3c).

Current formatting for publication in BMJ Open

- 1  
2  
3 236 • 3b "So that negative study for aspirin in older patients; kind of makes me think- should I be  
4 237 giving it to someone with average risk of colorectal cancer?" Gastroenterologist, 32 years  
5 238 old  
6  
7 239 • 3c "So there was a big study here in Australia, and then a little bit of input from the US done  
8 240 over the last few years, came out last year, the ASPREE study, so I did a talk on it, so I looked  
9 241 at the primary prevention of aspirin in the cardiovascular disease, and it showed that low-  
10 242 dose aspirin for healthy older adults had no impact on primary prevention and  
11 243 cardiovascular risk" Pharmacist, 26 years old

13 244 Guidelines on the use of aspirin for disease prevention have changed over time, generating confusion  
14 245 among participants. Historically, aspirin was recommended for primary prevention of cardiovascular  
15 246 disease in certain at-risk patients, but guidelines were later altered, recommending it only for  
16 247 secondary prevention.<sup>10,11</sup> Participants stated that it is hard to keep up with the latest  
17 248 recommendations, and that this ongoing change in advice caused reluctance to recommend them.  
18 249 (Quotation 3d)

- 21 250 • 3d "With aspirin, it was always for stroke prevention, and now they're turning around and  
22 251 saying no, we shouldn't be doing it for that! And you sort of wonder, well, is this going to be  
23 252 the same sort of thing? The, one of the issues with medications and guidelines as such is that  
24 253 they keep changing." Pharmacist, 50 years old

#### 25 254 26 255 **4. Characteristics of Individuals**

##### 27 256 **Whose role is it to recommend aspirin?**

28 257 Hospital-based clinicians generally supported the guidelines and saw their role as advocates rather  
29 258 than implementers of the guidelines. (Quotations 4a and 4b) All participants, including GPs, saw that  
30 259 the primary responsibility to implement the aspirin guidelines rested in primary care. (Quotations 4c  
31 260 and 4d)

- 32 261 • 4a "So, you know I'm a Geneticist. I think talking to GPs and Gastroenterologists would be a  
33 262 much better group [laughs] than Geneticists." Geneticist, 34 years old  
34  
35 263 • 4b "People are still very GP centred, so a lot of, even if we suggest things like this, a lot of  
36 264 people would still then go and talk to their GP before they decided to start something."  
37 265 Pharmacist, 50 years old  
38  
39 266 • 4c "If you understand what I mean, it's absolutely...I agree with those specialists, I do think it  
40 267 is part of the role of the GP to talk about these preventative health issues specifically  
41 268 prescribing aspirin" General practitioner, 28 years old  
42  
43 269 • 4d "It's interesting when new guidelines come out, because guidelines come out all the time,  
44 270 and this is a really - this is our bread and butter as a GP" General practitioner, 48 years old  
45  
46  
47  
48  
49

##### 50 271 **Knowledge / awareness of the CCA guidelines**

51 272 Knowledge and awareness of the guidelines was mixed. The FCC staff were more knowledgeable of  
52 273 the guidelines, specifically as they work with populations at increased risk of CRC, and awareness of  
53 274 recommendations about aspirin use in people with Lynch syndrome. Whereas GPs, pharmacists and  
54 275 gastroenterologists were either unaware or had limited knowledge of the guidelines. (Quotations 4e  
55 276 and 4f)

- 56  
57 277 • 4e "All I know about low-dose aspirin in bowel cancer is that it can be used, but in certain  
58 278 populations, but beyond that, I actually really don't know." Geneticist, 32 years old  
59  
60

Current formatting for publication in BMJ Open

- 1  
2  
3 279 • 4f "I would say that going across, we have three different clinicians at work and I don't think  
4 280 I've ever heard them recommend aspirin for someone who actually doesn't have something  
5 281 like Lynch syndrome." Genetic counsellor, 57 years old

## 7 282 5. Process

### 8 283 Implementation of the CCA guidelines

9 284 While most participants considered themselves as early adopters, they admitted that clinicians in  
10 285 general would wait before adopting new clinical guidelines. (Quotation 5a) Most health professionals  
11 286 agreed that patients would be receptive to taking extra medication such as aspirin for CRC prevention.  
12 287 (Quotation 5b) Nevertheless, a decision aid was thought to be potentially useful to facilitate  
13 288 discussion about the risks and benefits of taking aspirin. (Quotation 5c) Several participants could see  
14 289 how they could discuss aspirin as part of their usual consultation. (Quotation 5d)

- 17 290 • 5a "Other doctors like to be on the tail end because they've been burnt a few times when  
18 291 things have kind of flipped back the other way." General practitioner, 38 years old
- 20 292 • 5b "You know, I think the people who already take tablets for something find it quite easy to  
21 293 beguile an extra tablet. So, someone's already on a cholesterol tablet, they're on a high blood  
22 294 pressure tablet, it's easy for them to add aspirin to that." Gastroenterologist, 60 years old
- 24 295 • 5c "Well that (a decision aid) might have been useful for the patient to show them what could  
25 296 happen and how effective it is if they ask." General practitioner, 58 years old
- 27 297 • 5d "You know, I appreciate they're guidelines and they're not mandatory, and if it fits in with  
28 298 the way I would practice, I'm happy to sort of incorporate them into what I do."  
29 299 Gastroenterologist, 65 years old

## 31 300 Discussion

32 301 This is the first study to our knowledge to examine the perspectives of a wide range of Australian  
33 302 clinicians about recommending aspirin to reduce bowel cancer risk. Aspirin was considered as readily  
34 303 available, affordable and safe. However, the ambiguity about the recommended dose and perceived  
35 304 strength of the evidence was a concern for several clinicians. The media attention about the ASPREE  
36 305 trial<sup>12</sup> added to the perceived uncertainty about the evidence. Busy work environments meant limited  
37 306 time to spend on prevention. The endorsement from Cancer Council Australia, a nationwide not-for-  
38 307 profit organisation, meant the guidelines were perceived as trustworthy and therefore more likely to  
39 308 be implemented.

43 309 FCC staff and gastroenterologists are generally aware of aspirin recommendations for patients at  
44 310 increased CRC risk and suggested that GPs are better placed to discuss aspirin in those at average  
45 311 risk. These hospital specialists felt they could advocate the use of aspirin but the ultimate  
46 312 responsibility for initiation rested in general practice. Pharmacists similarly felt they could facilitate  
47 313 the process but would not initiate discussions about aspirin. GPs agreed that this was part of their role,  
48 314 for example when discussing bowel cancer screening, but had limited awareness of the guidelines.

50 315 There is often a large investment of time, resources and clinical expertise involved in producing  
51 316 national clinical guidelines, however, there is typically no accompanying strategy to implement  
52 317 them.<sup>13,14</sup> Between 2003 and 2007, 313 clinical practice guidelines were produced in Australia by over  
53 318 80 guideline producers<sup>15</sup>, but with limited clinical uptake.<sup>16,17</sup>

56 319 The uptake of guidelines into clinical practice is influenced by several factors including the guideline  
57 320 characteristics, ease of implementation, clarity of the guidelines and individual clinicians' familiarity  
58 321 with the intervention and evidence.<sup>18</sup> Our study highlights several of these factors which could act as  
59 322 barriers to widespread implementation of the aspirin guidelines. Superficially, one might expect

Current formatting for publication in BMJ Open

323 recommending a familiar, low cost, over-the-counter drug would be easily implemented. But lack of  
324 clarity, partly due to the specific wording of the recommendation, could alter perceptions of the  
325 evidence and jeopardise uptake of the guideline.

326 Uncertainties amongst clinicians about the evidence for aspirin in disease prevention is exacerbated  
327 by changes in recommendations about its use in cardiovascular disease. The Cancer Council Australia  
328 guideline specifically considered the evidence as it relates to preventing colorectal cancer. It did not  
329 discuss related evidence of reduced incidence and mortality from other cancers<sup>3</sup> or for the primary  
330 prevention of cardiovascular disease.<sup>19</sup> The US Preventative Services Taskforce recommends aspirin  
331 for CRC prevention only in people who are also at moderately increased risk of cardiovascular  
332 disease.<sup>20</sup> In addition, their recommendations about its use are stronger for people aged 50 to 59  
333 years, compared with those aged 60 to 69 years because the risk of serious side-effects from aspirin  
334 increases with age.

335 There was little awareness amongst many participants of the additional effects of aspirin on all-cancer  
336 incidence and mortality, but this is an important additional consideration for patients when making  
337 informed decisions about taking aspirin. Clinicians in our study recognised the potential benefit of a  
338 decision aid to support discussions about taking aspirin. There is strong evidence to show that  
339 decision aids can support informed decision making, particularly when decisions require weighing up  
340 benefits and risks which are preference sensitive.<sup>21</sup> Patients need to understand the potential benefits  
341 of aspirin in terms of reduced incidence and death from cancer and cardiovascular disease, and harms  
342 from gastrointestinal and intracranial haemorrhage. In a vignette study testing graphical approaches to  
343 communicating these harms and benefits from aspirin, over 70% of Australian patients aged 50-70  
344 were willing to take aspirin for disease prevention.<sup>22</sup> The use of a decision aid has the potential to  
345 inform the clinicians which addresses a major barrier to implementation, as GPs have limited  
346 awareness of the guidelines. A decision aid would enhance the clarity of the recommendation and  
347 facilitate a discussion about the aspirin guidelines with patients.

### 348 **Implications & limitations**

349 In this in-depth qualitative study, we recruited a large sample of diverse participants representing  
350 different clinical disciplines, varied length of experience, and work settings. Although we recruited  
351 participants only from Victoria, we believe our findings are likely to be transferable to other  
352 Australian clinicians although we acknowledge that there may be other barriers and facilitators  
353 experienced by clinicians from remote locations.

354 The national guidelines on aspirin represent an important new approach to reducing the incidence and  
355 mortality of bowel cancer in Australia. But the absence of a strategic and more active implementation  
356 plan, means these guidelines are less likely to be translated into clinical practice.<sup>23</sup> Specific  
357 implementation strategies for general practice are necessary to increase the awareness and uptake of  
358 these guidelines. Our findings suggest that a stronger statement of recommendation and clarity about  
359 dosage are required. Engagement with pharmacists is also necessary to ensure they are aware of the  
360 guidelines and are prepared to endorse any advice from someone's GP about using aspirin. These  
361 implementation strategies could be supplemented by approaches to raise awareness in the community  
362 about the role of aspirin and decision aids to facilitate discussions between GPs and patients and  
363 support informed choices about CRC prevention.

### 364 **Author statement:**

365 Conception or design of the work: SM JM, FM, and JE. Acquisition, analysis or interpretation of data:  
366 SM, JM, TY, PA, SS NK, PN. Drafting the work: SM. Critically revising the work: SM, SS, PL and  
367 JE. Final approval of submitted version: all authors.



Current formatting for publication in BMJ Open

368 **Ethics Approval:** Ethical approval was provided by the Human Ethics Sub-Committee of the  
 369 University of Melbourne (Ethics ID:1853266) and all participants provided informed written consent  
 370 before taking part in this project.

371 **Twitter:** Shakira Milton @ShakiraMilton

372 **ORCID IDs:** Shakira Milton <https://orcid.org/0000-0002-8510-6351>

373 Jennifer McIntosh <https://orcid.org/0000-0002-6655-0940>

374 Thivagar Yogaparan <https://orcid.org/0000-0003-3840-2999>

375 Pavithran Alphonse <https://orcid.org/0000-0003-3840-2999>

376 Sibel Saya <https://orid.org/0000-0002-4796-6852>

377 Peter Nguyen <https://orcid.org/0000-0002-8282-7663>

378 Phyllis Lau <https://orcid.org/0000-0002-0665-6348>

379 Jon Emery [0000-0002-5274-6336](https://orcid.org/0000-0002-5274-6336)

380 **Funding:** This project was funded by a dedicated grant from the Victorian Comprehensive Cancer  
 381 Centre Precision Prevention Program: VCCC 075739

382 **Data availability:** De-identified participant transcripts are available upon request and are stored in the  
 383 University of Melbourne secure two-step verification cloud which is only accessible by a University  
 384 laptop and VPN. If you would like to request transcript data, please contact the first author.

385 **Competing interests:** JE and FM were members of the Cancer Council Australia guideline  
 386 development group which recommends the use of low dose aspirin for the prevention of colorectal  
 387 cancer.

## 388 References

- 389 1. Australian Institute of Health and Welfare. *Cancer in Australia. Cancer in Australia* (2019).  
 390 doi:Cancer series no. 119. Cat. no. CAN123.
- 391 2. Chemopreventive candidate agents - Clinical Guidelines Wiki. Available at:  
 392 [https://wiki.cancer.org.au/australia/Clinical\\_question:Aspirin\\_for\\_prevention\\_of\\_colorectal\\_ca](https://wiki.cancer.org.au/australia/Clinical_question:Aspirin_for_prevention_of_colorectal_cancer)  
 393 ncer. (Accessed: 8th November 2019)
- 394 3. Rothwell, P. M. *et al.* Effect of daily aspirin on long-term risk of death due to cancer: analysis  
 395 of individual patient data from randomised trials. *Lancet* **377**, 31–41 (2011).
- 396 4. Aspirin in the primary and secondary prevention of vascular disease: collaborative meta-  
 397 analysis of individual participant data from randomised trials. *Lancet* **373**, 1849–1860 (2009).
- 398 5. CFIR Booklet. Available at: [http://cfirwiki.net/guide/app/index.html#/guide\\_select](http://cfirwiki.net/guide/app/index.html#/guide_select). (Accessed:  
 399 7th November 2019)
- 400 6. Constructs | The Consolidated Framework for Implementation Research. Available at:  
 401 <https://cfirguide.org/constructs/>. (Accessed: 8th November 2019)
- 402 7. QSR International Pty Ltd. (2018) NVivo (Version  
 403 12), <https://www.qsrinternational.com/nvivo-qualitative-data-analysis-software/home>.  
 404 (Accessed: 8th November 2019)
- 405 8. McNeil, J. J. *et al.* Effect of Aspirin on Disability-free Survival in the Healthy Elderly. *N.*  
 406 *Engl. J. Med.* **379**, 1499–1508 (2018).
- 407 9. McNeil, J. J. *et al.* Effect of Aspirin on All-Cause Mortality in the Healthy Elderly. *N. Engl. J.*  
 408 *Med.* **379**, 1519–1528 (2018).
- 409 10. Matthys, F., De Backer, T., De Backer, G. & Stichele, R. Vander. Review of guidelines on  
 410 primary prevention of cardiovascular disease with aspirin: How much evidence is needed to  
 411 turn a tanker? *European Journal of Preventive Cardiology* **21**, 354–365 (2014).

Current formatting for publication in BMJ Open

- 1  
2  
3 412 11. Schnell, O., Erbach, M. & Hummel, M. Primary and secondary prevention of cardiovascular  
4 413 disease in diabetes with aspirin. *Diabetes and Vascular Disease Research* **9**, 245–255 (2012).  
5  
6 414 12. Mcneil, J. J. *et al.* Medical Sciences cite as. *J Gerontol A Biol Sci Med Sci* **72**, 1586–1593  
7 415 (2017).  
8  
9 416 13. Kredo, T. *et al.* Guide to clinical practice guidelines: the current state of play. *Int. J. Qual.*  
10 417 *Heal. Care* **28**, 122–128 (2016).  
11  
12 418 14. Guide to the development, evaluation and implementation of clinical practice guidelines |  
13 419 NHMRC. Available at: [https://www.nhmrc.gov.au/about-us/publications/guide-development-](https://www.nhmrc.gov.au/about-us/publications/guide-development-evaluation-and-implementation-clinical-practice-guidelines)  
14 420 [evaluation-and-implementation-clinical-practice-guidelines](https://www.nhmrc.gov.au/about-us/publications/guide-development-evaluation-and-implementation-clinical-practice-guidelines). (Accessed: 1st April 2020)  
15  
16 421 15. Buchan, H. A., Currie, K. C., Lourey, E. J. & Duggan, G. R. Australian clinical practice  
17 422 guidelines — a national study. *Med. J. Aust.* **192**, 490–494 (2010).  
18  
19 423 16. Jiang, V., Brooks, E. M., Tong, S. T., Heintzman, J. & Krist, A. H. Factors Influencing Uptake  
20 424 of Changes to Clinical Preventive Guidelines. *J. Am. Board Fam. Med.* **33**, 271–278  
21 425 (2020).  
22  
23 426 17. Raz, D. J. *et al.* Perceptions and utilization of lung cancer screening among primary care  
24 427 physicians. *J. Thorac. Oncol.* **11**, 1856–1862 (2016).  
25  
26 428 18. Turner, S. *et al.* Evidence use in decision-making on introducing innovations: A systematic  
27 429 scoping review with stakeholder feedback. *Implementation Science* **12**, 145 (2017).  
28  
29 430 19. Aspirin in the primary and secondary prevention of vascular disease: collaborative meta-  
30 431 analysis of individual participant data from randomised trials. *Lancet* **373**, 1849–1860 (2009).  
31  
32 432 20. Bibbins-Domingo, K. *et al.* Aspirin use for the primary prevention of cardiovascular disease  
33 433 and colorectal cancer: U.S. preventive services task force recommendation statement. *Annals*  
34 434 *of Internal Medicine* **164**, 836–845 (2016).  
35  
36 435 21. Stacey, D. *et al.* Decision aids for people facing health treatment or screening decisions.  
37 436 *Cochrane Database Syst. Rev.* (2017). doi:10.1002/14651858.CD001431.pub5  
38  
39 437 22. Nguyen, P. *et al.* Benefits and harms of aspirin to reduce colorectal cancer risk: A cross-  
40 438 sectional study of methods to communicate risk in primary care. *Br. J. Gen. Pract.* **69**, E843–  
41 439 E849 (2019).  
42  
43 440 23. Jiang, V., Brooks, E. M., Tong, S. T., Heintzman, J. & Krist, A. H. Factors Influencing Uptake  
44 441 of Changes to Clinical Preventive Guidelines. doi:10.3122/jabfm.2020.02.190146  
45  
46  
47  
48  
49  
50  
51  
52  
53  
54  
55  
56  
57  
58  
59  
60

## Supplementary Materials

### **Clinicians' opinions on recommending aspirin to prevent colorectal cancer to Australians aged 50 to 70 years: a qualitative study**

#### **S1. Interview schedule**

Clinicians' interviews will be guided by the following schedule which only provides general areas to be covered.

**\*\*Remind them that you'll be recording the interview and START recording**

#### **DEMOGRAPHICS**

- Age, gender, years of practice, specialization, place(s) of work: clinic(s) or hospital(s)

#### **INTRODUCE CANCER COUNCIL GUIDELINES**

*(Show laminated version of summary / recommendations)*

- Are you aware of the new guidelines? What is your understanding of the aspirin recommendations?
- Are you aware of guidelines that recommend prescribing aspirin to prevent bowel cancer?

#### **OPINION ON GUIDELINES**

- *If aware of guidelines:* what is your professional opinion of them?
- What are your thoughts underpinning the evidence around these guidelines?
- What do you think about using aspirin to prevent bowel cancer?
- Are you aware of the potential benefits and harms of using aspirin to prevent bowel cancer?
- Do you have clinical experience with the harms of using aspirin?

#### **CURRENT PRACTICE/ PREVENTION**

- When you consult with patients, what bowel cancer and cardiovascular disease prevention strategies do you incorporate into the consultation?
- Do you think this is part of your role as a general practitioner?
  - *If not:* whose role do you think it is?
- Do you currently recommend aspirin to patients?
- Which patients would you and would you not consider recommending aspirin to? Why?
  - Specific conditions, prevention?
  - How about those with or without a family history (e.g. Lynch syndrome)?

1  
2  
3  
4 **PATIENT OPINION**  
5

- 6
- 7 • What do think your patients would feel about using aspirin preventively?
  - 8 • Have you had any feedback from patients about their experience of using aspirin preventively?
- 9  
10  
11  
12

13 **PATIENT EDUCATION**  
14

- 15 • How would you go about explaining the benefits and potential harms of taking aspirin?
  - 16 • What supportive information would you use and why?
- 17  
18  
19

20 **INTRODUCE EXPECTED FREQUENCY TREES**  
21

22 *Show clinician the 2 expected frequency trees – **incidence** and **mortality**. Provide **evidence** for where*  
23 *the **numbers come from**. Emphasise it was developed for people aged **50-70**.*

- 24 • What do you think about the EFT?
  - 25 • Would the decision aid be helpful in these discussions with pts?
- 26  
27  
28  
29

30 **NEW GUIDELINE IMPLEMENTATION: ROUTINE PRACTICE**  
31

- 32 • Generally, when there is a new guideline, how do you find out about it?
  - 33 • How do you incorporate new guidelines into practice?
  - 34 • What challenges do you encounter when implementing new guidelines?
    - 35 ○ Private vs public
  - 36 • How does your clinic/hospital implement new guidelines?
  - 37 • Are you more likely to be early adopter or late adopter for new guidelines? Do you tend to wait to see what your colleagues are doing before starting to adopt new recommendations?
- 38  
39  
40  
41  
42  
43  
44  
45  
46  
47  
48  
49  
50  
51  
52  
53  
54  
55  
56  
57  
58  
59  
60

## COREQ (COnsolidated criteria for REporting Qualitative research) Checklist

A checklist of items that should be included in reports of qualitative research. You must report the page number in your manuscript where you consider each of the items listed in this checklist. If you have not included this information, either revise your manuscript accordingly before submitting or note N/A.

| Topic                                          | Item No. | Guide Questions/Description                                                                                                                              | Reported on Page No. |
|------------------------------------------------|----------|----------------------------------------------------------------------------------------------------------------------------------------------------------|----------------------|
| <b>Domain 1: Research team and reflexivity</b> |          |                                                                                                                                                          |                      |
| <i>Personal characteristics</i>                |          |                                                                                                                                                          |                      |
| Interviewer/facilitator                        | 1        | Which author/s conducted the interview or focus group?                                                                                                   |                      |
| Credentials                                    | 2        | What were the researcher's credentials? E.g. PhD, MD                                                                                                     |                      |
| Occupation                                     | 3        | What was their occupation at the time of the study?                                                                                                      |                      |
| Gender                                         | 4        | Was the researcher male or female?                                                                                                                       |                      |
| Experience and training                        | 5        | What experience or training did the researcher have?                                                                                                     |                      |
| <i>Relationship with participants</i>          |          |                                                                                                                                                          |                      |
| Relationship established                       | 6        | Was a relationship established prior to study commencement?                                                                                              |                      |
| Participant knowledge of the interviewer       | 7        | What did the participants know about the researcher? e.g. personal goals, reasons for doing the research                                                 |                      |
| Interviewer characteristics                    | 8        | What characteristics were reported about the interviewer/facilitator? e.g. Bias, assumptions, reasons and interests in the research topic                |                      |
| <b>Domain 2: Study design</b>                  |          |                                                                                                                                                          |                      |
| <i>Theoretical framework</i>                   |          |                                                                                                                                                          |                      |
| Methodological orientation and Theory          | 9        | What methodological orientation was stated to underpin the study? e.g. grounded theory, discourse analysis, ethnography, phenomenology, content analysis |                      |
| <i>Participant selection</i>                   |          |                                                                                                                                                          |                      |
| Sampling                                       | 10       | How were participants selected? e.g. purposive, convenience, consecutive, snowball                                                                       |                      |
| Method of approach                             | 11       | How were participants approached? e.g. face-to-face, telephone, mail, email                                                                              |                      |
| Sample size                                    | 12       | How many participants were in the study?                                                                                                                 |                      |
| Non-participation                              | 13       | How many people refused to participate or dropped out? Reasons?                                                                                          |                      |
| <i>Setting</i>                                 |          |                                                                                                                                                          |                      |
| Setting of data collection                     | 14       | Where was the data collected? e.g. home, clinic, workplace                                                                                               |                      |
| Presence of non-participants                   | 15       | Was anyone else present besides the participants and researchers?                                                                                        |                      |
| Description of sample                          | 16       | What are the important characteristics of the sample? e.g. demographic data, date                                                                        |                      |
| <i>Data collection</i>                         |          |                                                                                                                                                          |                      |
| Interview guide                                | 17       | Were questions, prompts, guides provided by the authors? Was it pilot tested?                                                                            |                      |
| Repeat interviews                              | 18       | Were repeat interviews carried out? If yes, how many?                                                                                                    |                      |
| Audio/visual recording                         | 19       | Did the research use audio or visual recording to collect the data?                                                                                      |                      |
| Field notes                                    | 20       | Were field notes made during and/or after the interview or focus group?                                                                                  |                      |
| Duration                                       | 21       | What was the duration of the interviews or focus group?                                                                                                  |                      |
| Data saturation                                | 22       | Was data saturation discussed?                                                                                                                           |                      |
| Transcripts returned                           | 23       | Were transcripts returned to participants for comment and/or                                                                                             |                      |

| Topic                                  | Item No. | Guide Questions/Description                                                                                                        | Reported on Page No. |
|----------------------------------------|----------|------------------------------------------------------------------------------------------------------------------------------------|----------------------|
|                                        |          | correction?                                                                                                                        |                      |
| <b>Domain 3: analysis and findings</b> |          |                                                                                                                                    |                      |
| <i>Data analysis</i>                   |          |                                                                                                                                    |                      |
| Number of data coders                  | 24       | How many data coders coded the data?                                                                                               |                      |
| Description of the coding tree         | 25       | Did authors provide a description of the coding tree?                                                                              |                      |
| Derivation of themes                   | 26       | Were themes identified in advance or derived from the data?                                                                        |                      |
| Software                               | 27       | What software, if applicable, was used to manage the data?                                                                         |                      |
| Participant checking                   | 28       | Did participants provide feedback on the findings?                                                                                 |                      |
| <i>Reporting</i>                       |          |                                                                                                                                    |                      |
| Quotations presented                   | 29       | Were participant quotations presented to illustrate the themes/findings?<br>Was each quotation identified? e.g. participant number |                      |
| Data and findings consistent           | 30       | Was there consistency between the data presented and the findings?                                                                 |                      |
| Clarity of major themes                | 31       | Were major themes clearly presented in the findings?                                                                               |                      |
| Clarity of minor themes                | 32       | Is there a description of diverse cases or discussion of minor themes?                                                             |                      |

Developed from: Tong A, Sainsbury P, Craig J. Consolidated criteria for reporting qualitative research (COREQ): a 32-item checklist for interviews and focus groups. *International Journal for Quality in Health Care*. 2007. Volume 19, Number 6: pp. 349 – 357

**Once you have completed this checklist, please save a copy and upload it as part of your submission. DO NOT include this checklist as part of the main manuscript document. It must be uploaded as a separate file.**

SPQR checklist for Clinicians' opinions on recommending aspirin to prevent colorectal cancer to Australians aged 50 to 70 years: a qualitative study

### Standards for Reporting Qualitative Research (SRQR)\*

<http://www.equator-network.org/reporting-guidelines/srqr/>

Page/line no(s).

#### Title and abstract

|                                                                                                                                                                                                                                                              |                    |
|--------------------------------------------------------------------------------------------------------------------------------------------------------------------------------------------------------------------------------------------------------------|--------------------|
| <p><b>Title</b> - Concise description of the nature and topic of the study Identifying the study as qualitative or indicating the approach (e.g., ethnography, grounded theory) or data collection methods (e.g., interview, focus group) is recommended</p> | Page 1/ line 1-3   |
| <p><b>Abstract</b> - Summary of key elements of the study using the abstract format of the intended publication; typically includes background, purpose, methods, results, and conclusions</p>                                                               | Page 2/ line 35-62 |

#### Introduction

|                                                                                                                                                                     |                    |
|---------------------------------------------------------------------------------------------------------------------------------------------------------------------|--------------------|
| <p><b>Problem formulation</b> - Description and significance of the problem/phenomenon studied; review of relevant theory and empirical work; problem statement</p> | Page 3/ line 75-90 |
| <p><b>Purpose or research question</b> - Purpose of the study and specific objectives or questions</p>                                                              | Page 3/ line 91-94 |

#### Methods

|                                                                                                                                                                                                                                                                                                                                                                                                             |                                     |
|-------------------------------------------------------------------------------------------------------------------------------------------------------------------------------------------------------------------------------------------------------------------------------------------------------------------------------------------------------------------------------------------------------------|-------------------------------------|
| <p><b>Qualitative approach and research paradigm</b> - Qualitative approach (e.g., ethnography, grounded theory, case study, phenomenology, narrative research) and guiding theory if appropriate; identifying the research paradigm (e.g., postpositivist, constructivist/ interpretivist) is also recommended; rationale**</p>                                                                            | Page 3/ line 99<br>Page 3/ line 100 |
| <p><b>Researcher characteristics and reflexivity</b> - Researchers' characteristics that may influence the research, including personal attributes, qualifications/experience, relationship with participants, assumptions, and/or presuppositions; potential or actual interaction between researchers' characteristics and the research questions, approach, methods, results, and/or transferability</p> | Page 4/ lines 120 - 126             |
| <p><b>Context</b> - Setting/site and salient contextual factors; rationale**</p>                                                                                                                                                                                                                                                                                                                            | Page 3/ line 105                    |
| <p><b>Sampling strategy</b> - How and why research participants, documents, or events were selected; criteria for deciding when no further sampling was necessary (e.g., sampling saturation); rationale**</p>                                                                                                                                                                                              | Page 3/ line 104                    |
| <p><b>Ethical issues pertaining to human subjects</b> - Documentation of approval by an appropriate ethics review board and participant consent, or explanation for lack thereof; other confidentiality and data security issues</p>                                                                                                                                                                        | Page 10 / line 345 - 347            |

|                        |                                                                                                                                                                                                                                                                                                                          |                                    |
|------------------------|--------------------------------------------------------------------------------------------------------------------------------------------------------------------------------------------------------------------------------------------------------------------------------------------------------------------------|------------------------------------|
| 1<br>2<br>3<br>4<br>5  | <b>Data collection methods</b> - Types of data collected; details of data collection procedures including (as appropriate) start and stop dates of data collection and analysis, iterative process, triangulation of sources/methods, and modification of procedures in response to evolving study findings; rationale** | Page 3/ line 113                   |
| 6<br>7<br>8<br>9<br>10 | <b>Data collection instruments and technologies</b> - Description of instruments (e.g., interview guides, questionnaires) and devices (e.g., audio recorders) used for data collection; if/how the instrument(s) changed over the course of the study                                                                    | Page 4/ line 126                   |
| 11<br>12<br>13         | <b>Units of study</b> - Number and relevant characteristics of participants, documents, or events included in the study; level of participation (could be reported in results)                                                                                                                                           | Page 5/ line 143 and line 151      |
| 14<br>15<br>16<br>17   | <b>Data processing</b> - Methods for processing data prior to and during analysis, including transcription, data entry, data management and security, verification of data integrity, data coding, and anonymization/de-identification of excerpts                                                                       | Page 4/ line 126                   |
| 18<br>19<br>20<br>21   | <b>Data analysis</b> - Process by which inferences, themes, etc., were identified and developed, including the researchers involved in data analysis; usually references a specific paradigm or approach; rationale**                                                                                                    | Page 4/ line 128-129/ line 131-138 |
| 22<br>23<br>24<br>25   | <b>Techniques to enhance trustworthiness</b> - Techniques to enhance trustworthiness and credibility of data analysis (e.g., member checking, audit trail, triangulation); rationale**                                                                                                                                   | Page 4/ line 134- 135              |

## Results/findings

|                                  |                                                                                                                                                                                                   |                          |
|----------------------------------|---------------------------------------------------------------------------------------------------------------------------------------------------------------------------------------------------|--------------------------|
| 26<br>27<br>28<br>29<br>30<br>31 | <b>Synthesis and interpretation</b> - Main findings (e.g., interpretations, inferences, and themes); might include development of a theory or model, or integration with prior research or theory | Page 5-8/ line 143 - 280 |
| 32<br>33<br>34                   | <b>Links to empirical data</b> - Evidence (e.g., quotes, field notes, text excerpts, photographs) to substantiate analytic findings                                                               | Page 5-8/ line 143 - 280 |

## Discussion

|                                                    |                                                                                                                                                                                                                                                                                                                                                                                                             |                           |
|----------------------------------------------------|-------------------------------------------------------------------------------------------------------------------------------------------------------------------------------------------------------------------------------------------------------------------------------------------------------------------------------------------------------------------------------------------------------------|---------------------------|
| 35<br>36<br>37<br>38<br>39<br>40<br>41<br>42<br>43 | <b>Integration with prior work, implications, transferability, and contribution(s) to the field</b> - Short summary of main findings; explanation of how findings and conclusions connect to, support, elaborate on, or challenge conclusions of earlier scholarship; discussion of scope of application/generalizability; identification of unique contribution(s) to scholarship in a discipline or field | Page 8- 9/ line 282 - 327 |
| 44<br>45                                           | <b>Limitations</b> - Trustworthiness and limitations of findings                                                                                                                                                                                                                                                                                                                                            | Page 9/ line 334 - 340    |

## Other

|                            |                                                                                                                                               |                         |
|----------------------------|-----------------------------------------------------------------------------------------------------------------------------------------------|-------------------------|
| 46<br>47<br>48<br>49<br>50 | <b>Conflicts of interest</b> - Potential sources of influence or perceived influence on study conduct and conclusions; how these were managed | Page 10/ line 359 - 361 |
| 51<br>52<br>53             | <b>Funding</b> - Sources of funding and other support; role of funders in data collection, interpretation, and reporting                      | Page 10/ line 357 - 358 |



# BMJ Open

## Clinicians' opinions on recommending aspirin to prevent colorectal cancer to Australians aged 50 to 70 years: a qualitative study

|                                 |                                                                                                                                                                                                                                                                                                                                                                                                                                                                                                                                                                                                                                                                                                                                                                                                                                                                                                                                                                                                                                                                                                                                                                                                                                                                                                                                                                                                                                                                                                                                                                                                                                                                                                                                                                                                                                                                                                                                            |
|---------------------------------|--------------------------------------------------------------------------------------------------------------------------------------------------------------------------------------------------------------------------------------------------------------------------------------------------------------------------------------------------------------------------------------------------------------------------------------------------------------------------------------------------------------------------------------------------------------------------------------------------------------------------------------------------------------------------------------------------------------------------------------------------------------------------------------------------------------------------------------------------------------------------------------------------------------------------------------------------------------------------------------------------------------------------------------------------------------------------------------------------------------------------------------------------------------------------------------------------------------------------------------------------------------------------------------------------------------------------------------------------------------------------------------------------------------------------------------------------------------------------------------------------------------------------------------------------------------------------------------------------------------------------------------------------------------------------------------------------------------------------------------------------------------------------------------------------------------------------------------------------------------------------------------------------------------------------------------------|
| Journal:                        | <i>BMJ Open</i>                                                                                                                                                                                                                                                                                                                                                                                                                                                                                                                                                                                                                                                                                                                                                                                                                                                                                                                                                                                                                                                                                                                                                                                                                                                                                                                                                                                                                                                                                                                                                                                                                                                                                                                                                                                                                                                                                                                            |
| Manuscript ID                   | bmjopen-2020-042261.R2                                                                                                                                                                                                                                                                                                                                                                                                                                                                                                                                                                                                                                                                                                                                                                                                                                                                                                                                                                                                                                                                                                                                                                                                                                                                                                                                                                                                                                                                                                                                                                                                                                                                                                                                                                                                                                                                                                                     |
| Article Type:                   | Original research                                                                                                                                                                                                                                                                                                                                                                                                                                                                                                                                                                                                                                                                                                                                                                                                                                                                                                                                                                                                                                                                                                                                                                                                                                                                                                                                                                                                                                                                                                                                                                                                                                                                                                                                                                                                                                                                                                                          |
| Date Submitted by the Author:   | 17-Dec-2020                                                                                                                                                                                                                                                                                                                                                                                                                                                                                                                                                                                                                                                                                                                                                                                                                                                                                                                                                                                                                                                                                                                                                                                                                                                                                                                                                                                                                                                                                                                                                                                                                                                                                                                                                                                                                                                                                                                                |
| Complete List of Authors:       | Milton, Shakira; The University of Melbourne Faculty of Medicine Dentistry and Health Sciences, Department of General Practice; The University of Melbourne - Parkville Campus, Centre for Cancer Research<br>McIntosh, Jennifer; Monash University, Department of Software Systems & Cybersecurity; The University of Melbourne Faculty of Medicine Dentistry and Health Sciences, Department of General Practice<br>Yogaparan, Thivagar; The University of Melbourne Faculty of Medicine Dentistry and Health Sciences, Department of General Practice; The University of Melbourne - Parkville Campus, Centre for Cancer Research<br>Alphonse, Pavithran; The University of Melbourne - Parkville Campus, Centre for Cancer Research; The University of Melbourne Faculty of Medicine Dentistry and Health Sciences, Department of General Practice<br>Saya, Sibel; The University of Melbourne, Department of General Practice; The University of Melbourne Faculty of Medicine Dentistry and Health Sciences, Department of General Practice<br>Karnchanachari, Napin; The University of Melbourne - Parkville Campus, Centre for Cancer Research; The University of Melbourne Faculty of Medicine Dentistry and Health Sciences, Department of General Practice<br>Nguyen, Peter; The University of Melbourne - Parkville Campus, Centre for Cancer Research; The University of Melbourne Faculty of Medicine Dentistry and Health Sciences, Department of General Practice<br>Lau, Phyllis; The University of Melbourne Faculty of Medicine Dentistry and Health Sciences, Department of General Practice<br>Macrae, Finlay; Royal Melbourne Hospital, Colorectal Medicine and Genetics<br>Emery, Jon; The University of Melbourne Faculty of Medicine Dentistry and Health Sciences, Department of General Practice; The University of Melbourne Faculty of Medicine Dentistry and Health Sciences, Department of General Practice |
| <b>Primary Subject Heading</b>: | Qualitative research                                                                                                                                                                                                                                                                                                                                                                                                                                                                                                                                                                                                                                                                                                                                                                                                                                                                                                                                                                                                                                                                                                                                                                                                                                                                                                                                                                                                                                                                                                                                                                                                                                                                                                                                                                                                                                                                                                                       |
| Secondary Subject Heading:      | Oncology, Public health, Patient-centred medicine                                                                                                                                                                                                                                                                                                                                                                                                                                                                                                                                                                                                                                                                                                                                                                                                                                                                                                                                                                                                                                                                                                                                                                                                                                                                                                                                                                                                                                                                                                                                                                                                                                                                                                                                                                                                                                                                                          |
| Keywords:                       | GENERAL MEDICINE (see Internal Medicine), Gastroenterology < INTERNAL MEDICINE, Epidemiology < ONCOLOGY, PREVENTIVE MEDICINE, PRIMARY CARE, QUALITATIVE RESEARCH                                                                                                                                                                                                                                                                                                                                                                                                                                                                                                                                                                                                                                                                                                                                                                                                                                                                                                                                                                                                                                                                                                                                                                                                                                                                                                                                                                                                                                                                                                                                                                                                                                                                                                                                                                           |

1  
2  
3  
4  
5  
6  
7  
8  
9  
10  
11  
12  
13  
14  
15  
16  
17  
18  
19  
20  
21  
22  
23  
24  
25  
26  
27  
28  
29  
30  
31  
32  
33  
34  
35  
36  
37  
38  
39  
40  
41  
42  
43  
44  
45  
46  
47  
48  
49  
50  
51  
52  
53  
54  
55  
56  
57  
58  
59  
60

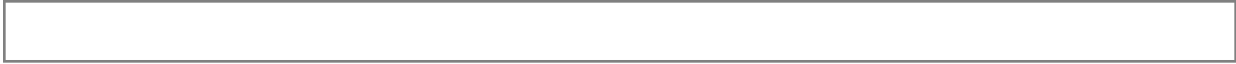

SCHOLARONE™  
Manuscripts

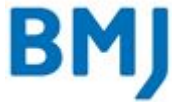

I, the Submitting Author has the right to grant and does grant on behalf of all authors of the Work (as defined in the below author licence), an exclusive licence and/or a non-exclusive licence for contributions from authors who are: i) UK Crown employees; ii) where BMJ has agreed a CC-BY licence shall apply, and/or iii) in accordance with the terms applicable for US Federal Government officers or employees acting as part of their official duties; on a worldwide, perpetual, irrevocable, royalty-free basis to BMJ Publishing Group Ltd ("BMJ") its licensees and where the relevant Journal is co-owned by BMJ to the co-owners of the Journal, to publish the Work in this journal and any other BMJ products and to exploit all rights, as set out in our [licence](#).

The Submitting Author accepts and understands that any supply made under these terms is made by BMJ to the Submitting Author unless you are acting as an employee on behalf of your employer or a postgraduate student of an affiliated institution which is paying any applicable article publishing charge ("APC") for Open Access articles. Where the Submitting Author wishes to make the Work available on an Open Access basis (and intends to pay the relevant APC), the terms of reuse of such Open Access shall be governed by a Creative Commons licence – details of these licences and which [Creative Commons](#) licence will apply to this Work are set out in our licence referred to above.

Other than as permitted in any relevant BMJ Author's Self Archiving Policies, I confirm this Work has not been accepted for publication elsewhere, is not being considered for publication elsewhere and does not duplicate material already published. I confirm all authors consent to publication of this Work and authorise the granting of this licence.

Current formatting for publication in BMJ Open

# Clinicians' opinions on recommending aspirin to prevent colorectal cancer to Australians aged 50 to 70 years: a qualitative study

Shakira Milton<sup>1,2</sup>, Jennifer McIntosh<sup>2,3</sup>, Thivagar Yogaparan<sup>1,2</sup>, Pavithran Alphonse<sup>1,2</sup>, Sibel Saya<sup>1,2</sup>, Napin Karnchanachari<sup>1,2</sup>, Peter Nguyen<sup>1,2</sup>, Phyllis Lau<sup>2</sup>, Finlay Macrae<sup>4,5</sup>, Jon Emery<sup>1,2,6</sup>

## Author Affiliations

1. Centre for Cancer Research, University of Melbourne, Melbourne, Australia
2. Department of General Practice, University of Melbourne, Melbourne, Australia
3. Department of Software Systems & Cybersecurity, Monash University, Melbourne, Australia
4. Department of Medicine, The University of Melbourne, Melbourne
5. Colorectal Medicine and Genetics, The Royal Melbourne Hospital, Melbourne, Australia
6. The Primary Care Unit, University of Cambridge, Cambridge, United Kingdom

## Author's email addresses:

|                                                                                  |                                                                                          |
|----------------------------------------------------------------------------------|------------------------------------------------------------------------------------------|
| <a href="mailto:shakira.milton@unimelb.edu.au">shakira.milton@unimelb.edu.au</a> | <a href="mailto:jenny.mcintosh@monash.edu">jenny.mcintosh@monash.edu</a>                 |
| <a href="mailto:thivagaryogaparan@gmail.com">thivagaryogaparan@gmail.com</a>     | <a href="mailto:p.alphonse@student.unimelb.edu.au">p.alphonse@student.unimelb.edu.au</a> |
| <a href="mailto:sibel.saya@unimelb.edu.au">sibel.saya@unimelb.edu.au</a>         | <a href="mailto:napin@unimelb.edu.au">napin@unimelb.edu.au</a>                           |
| <a href="mailto:peter.nguyen2@unimelb.edu.au">peter.nguyen2@unimelb.edu.au</a>   | <a href="mailto:plau@unimelb.edu.au">plau@unimelb.edu.au</a>                             |
| <a href="mailto:finlay.macrae@mh.org.au">finlay.macrae@mh.org.au</a>             | <a href="mailto:jon.emery@unimelb.edu.au">jon.emery@unimelb.edu.au</a>                   |

## Corresponding author:

Shakira Milton  
Centre for Cancer Research  
Level 10, 305 Grattan Street  
Melbourne, VIC 3000  
E: [shakira.milton@unimelb.edu.au](mailto:shakira.milton@unimelb.edu.au)  
T: +61 3 85597085

**Acknowledgements:** The authors would like to acknowledge Primary Care Collaborative Cancer Clinical Trials Group (PC4) for supporting this project.

**Keywords:** Preventative medicine, General practice, Primary care, Cancer prevention, Bowel cancer, Aspirin, Guideline implementation, Chemoprevention

**Word Count:** 4,066

Current formatting for publication in BMJ Open

## 34 Abstract

### 35 Objectives

36 Australian guidelines recommend all 50 to 70-year-olds without existing contraindications consider  
37 taking low-dose aspirin (100 mg – 300 mg per day) for at least 2.5 years to reduce their risk of  
38 developing colorectal cancer.

39 We aimed to explore clinicians', practices, knowledge, opinions, and barriers and facilitators to the  
40 implementation of these new guidelines.

### 41 Methods

42 Semi-structured interviews were conducted with clinicians to whom the new guidelines may be  
43 applicable (familial cancer clinic staff (geneticists, oncologists and genetic counsellors),  
44 gastroenterologists, pharmacists, and general practitioners (GPs)).

45 The Consolidated Framework for Implementation Research (CFIR) underpinned the development of  
46 the interview guide. Coding was inductive and themes were developed through consensus between the  
47 authors.

48 Emerging themes were mapped onto the CFIR domains: characteristics of the intervention, outer  
49 setting, inner setting, individual characteristics and process.

### 50 Results

51 Sixty-four interviews were completed between March and October 2019. Aspirin was viewed as a  
52 safe and cheap option for cancer prevention. GPs were considered by all clinicians as the most  
53 important health professionals for implementation of the guidelines. Cancer Council Australia, as a  
54 trusted organisation, was an important facilitator to guideline adoption. Uncertainty about aspirin  
55 dosage and perceived strength of the evidence, precise wording of the recommendation, previous  
56 changes to guidelines about aspirin, and conflicting findings from trials in older populations were  
57 barriers to implementation.

### 58 Conclusion

59 Widespread adoption of these new guidelines could be an important strategy to reduce the incidence  
60 of bowel cancer, but this will require more active implementation strategies focused on primary care  
61 and the wider community.

### 62 Strengths and limitations of this study

63 Up to five short bullet points, no longer than one sentence each, that relate specifically to the methods.  
64 They should not include the results of the study.

- 65 • We recruited a large and diverse group of participants representing different clinical  
66 disciplines, varied length of experience, and work settings.
- 67 • We applied an established theoretical framework to study guideline implementation
- 68 • We recruited participants only from one state, Victoria, but we believe our findings are likely  
69 to be transferable to other Australian clinicians
- 70 • We acknowledge that there may be other barriers and facilitators experienced by clinicians  
71 from remote locations.

72

Current formatting for publication in BMJ Open

## 73 Introduction

74 In 2019, colorectal cancer (CRC) was the second most commonly diagnosed cancer in Australia in  
75 men and women (9,069 cases and 7,329 cases, respectively).<sup>1</sup> In November 2017, Cancer Council  
76 Australia updated their guidelines for the prevention of CRC to recommend that all people aged 50-70  
77 who are at average risk of CRC actively consider taking low-dose aspirin to reduce their risk of CRC.<sup>2</sup>  
78 Despite the publication of these national guidelines recommending a significant change in CRC  
79 prevention strategy, it has not been accompanied by an implementation strategy, rather relying on  
80 passive diffusion of the guidelines into clinical practice.

81 The new guidelines were endorsed by the National Health and Medical Research Council (NHMRC)  
82 and adopted by the Royal Australian College of General Practitioners (RACGP). Meta-analyses of  
83 randomised controlled trials of low-dose aspirin have demonstrated reduced incidence and mortality  
84 from colorectal cancer by 25% and 33% respectively, as well as a 33% reduction in all-cause cancer  
85 mortality, when taken for at least 2.5 years.<sup>3</sup> In addition to reducing the risk of colorectal cancer,  
86 aspirin also reduces the risk of cardiovascular disease (CVD) including myocardial infarctions,  
87 ischaemic strokes and transient ischaemic attacks by 6% per annum in primary prevention trials.<sup>4</sup>  
88 However, aspirin can cause side-effects including gastrointestinal haemorrhage, peptic ulcer and  
89 haemorrhagic stroke.

90 This project aimed to explore clinicians', practices, knowledge, opinions, and barriers and facilitators  
91 to the implementation of these guidelines, with the intention of developing implementation methods  
92 to increase the uptake of aspirin for CVD and CRC prevention and reduce development of colorectal  
93 cancer in the Australian population.

## 94 Methods

### 95 Approach

96 A qualitative case study using semi-structured interviews was conducted with a range of health  
97 professionals whom the new guidelines were most likely to directly impact, including  
98 gastroenterologists, geneticists, oncologists, genetic counsellors and general practitioners. A  
99 constructivist paradigm was used to generate new ideas from participants, using interviews to explore  
100 current practice, knowledge and opinions toward recommending aspirin to people at average risk of  
101 CRC and potential barriers and facilitators to implementing the guidelines.

### 102 Setting and sampling strategy

103 Recruitment was done through personal networks of the authors, as well as through social media  
104 posts, emailing through the Familial Cancer Centre (FCC) staff email list in the Parkville Precinct and  
105 cold calling general practices through the University of Melbourne's Department of General Practice  
106 Victorian Research and Education Network database. From these different sources of participants, we  
107 purposively sampled to achieve maximum variation in profession type, age, gender, years of  
108 experience and those working in both rural and urban Victoria, and public and private practice  
109 settings. As we sent out recruitment messages through different sources all participants opted in on  
110 their own. All participants provided written consent. General practitioners, as private practitioners,  
111 were reimbursed \$100 for their time as this group was the most difficult to recruit. Recruitment of all  
112 participants occurred between February and September 2019.

### 113 Data collection techniques

114 A semi-structured interview guide was developed based on the Consolidated Framework for  
115 Implementation Research (CFIR)<sup>5</sup> (Table 1). CFIR is a conceptual framework developed to guide the  
116 assessment of implementation contexts. It consists of five domains and 39 constructs representing all  
117 areas of a healthcare setting that impact upon the successful implementation of a new intervention.<sup>6</sup>  
118 The five overarching CFIR domains covers aspects of the design and cost of the intervention

Current formatting for publication in BMJ Open

119 characteristics, aspects of organisations and how they operate in the inner setting, individuals within  
 120 the organisations or characteristics of individuals like the culture and leadership, how outside  
 121 organisations or outer settings and beliefs, and implementation processes impact upon successful  
 122 implementation of an intervention.

123 The interview questions were adapted from the online CFIR guide, which provides a list of potentially  
 124 relevant interview questions for each of the constructs.<sup>5</sup> In this study, the ‘intervention’ was defined as  
 125 the national guideline recommending consideration of aspirin for CRC prevention. [Supplementary  
 126 Section 1].

127 The interviews were conducted by three researchers by authors SM, PA and TY who had no existing  
 128 relationships with the participants. The interviewing researchers disclosed their position in the  
 129 research to the participants and they were aware why the research was being conducted. Researcher  
 130 SM who interviewed the general practitioners, geneticists, oncologists and genetic counsellors is a  
 131 highly experienced female qualitative researcher. Researchers PA who interviewed pharmacists and  
 132 TY who interviewed gastroenterologists both were male students who were trained in qualitative  
 133 methods and supervised by experienced qualitative researchers (SM, JM, JE). Interviews were audio  
 134 recorded and transcribed verbatim. Field notes on the time and location were recorded in researchers’  
 135 notebook following the interviews. Researchers met regularly to review the interview transcripts and  
 136 discuss data and the emerging themes. Interview transcripts were not returned to participants.

### 137 Analysis

138 Qualitative transcript data were managed using NVivo 12<sup>7</sup>. The interviews for each type of  
 139 participant; FCC staff, GPs, gastroenterologists and pharmacists were initially analysed separately.  
 140 Complete coding of each interview was conducted by the author who interviewed the participant  
 141 where everything that was spoken by the participants was organised into specific topics. At the first  
 142 level of coding codes were produced inductively for each of the participant professional groups upon  
 143 completion. For enhanced interpretive rigour, several interviews in each participant group were co-  
 144 coded by another researcher and progressively checked in regular researcher meetings. The coding for  
 145 several interviews per participant type was checked by a second researcher.

146 After first-level coding, codes were grouped into themes. Thematic analysis was employed at this  
 147 level where themes emerged from the first-level coding through discussions between the researchers.  
 148 About 20 themes per professional group type were defined. Themes from each professional group  
 149 type were discussed between the researchers and brought together if they could be. Themes were then  
 150 mapped onto the domain and constructs from the CFIR<sup>6</sup>: characteristics of intervention, outer setting,  
 151 inner setting, characteristics of individuals and process (Table 1).

152 *Table 1. Overview of the Consolidated Framework for Implementation Research. The CFIR provides constructs*  
 153 *that have been associated with effective implementation.*<sup>6</sup>

| <i>Characteristics of Intervention</i>                                                                                                                             | <i>Inner Setting</i>                                                                                   | <i>Outer Setting</i>                                                                                       | <i>Individuals Involved</i>                                                                                                                                                       | <i>Implementation Process</i>                                          |
|--------------------------------------------------------------------------------------------------------------------------------------------------------------------|--------------------------------------------------------------------------------------------------------|------------------------------------------------------------------------------------------------------------|-----------------------------------------------------------------------------------------------------------------------------------------------------------------------------------|------------------------------------------------------------------------|
| - Intervention source<br>- Evidence strength and quality<br>- Relative advantage<br>- Adaptability<br>- Trialability<br>- Complexity<br>- Design quality<br>- Cost | - Structural characteristics<br>- Networks and communications<br>- Culture<br>- Implementation climate | - Patient needs and resources<br>-Cosmopolitanism<br>- Peer pressure<br>- External policies and incentives | - Knowledge and beliefs about the intervention<br>- Self-efficacy<br>- Individual stage of change<br>- Individual identification with organisation<br>- Other personal attributes | - Planning<br>- Engaging<br>- Executing<br>- Reflecting and evaluating |

Current formatting for publication in BMJ Open

154 **Patient and public involvement**

155 No patient involvement.

156 **Results**

157 Sixty-four participants were interviewed (Table 2). Interviews ranged from 20-50 minutes and were  
 158 face-to-face in the participants place of work (clinic, pharmacy or hospital consulting or meeting  
 159 room), except for four GPs who were interviewed over the phone. The researcher and participants  
 160 were the only ones present during the interviews, except for with pharmacists if there were  
 161 shopkeepers or pharmacy assistants present. The results are presented according to the domains of  
 162 CFIR (Table 3).

163 *Table 2. Characteristics of participants (N=64).*

| Characteristics                                  |    |
|--------------------------------------------------|----|
| Mean age (years)                                 | 41 |
| Sex, female (n)                                  | 35 |
| Profession (n)                                   |    |
| Gastroenterologist                               | 17 |
| Pharmacist                                       | 14 |
| General practitioner                             | 16 |
| Familial cancer on (FCC) staff                   |    |
| Genetic counsellor                               | 10 |
| Geneticists                                      | 4  |
| Oncologist                                       | 3  |
| Years in profession (n)                          |    |
| <10                                              | 23 |
| 10 – 19                                          | 22 |
| 20 – 29                                          | 8  |
| 30+                                              | 11 |
| Work setting                                     |    |
| General practice (%)                             |    |
| Bulk-billing clinic                              | 31 |
| Private                                          | 69 |
| Hospital (gastroenterologists and FCC staff) (%) |    |
| Public                                           | 77 |
| Private                                          | 23 |
| Pharmacy (%)                                     |    |
| Hospital                                         | 36 |
| Community                                        | 64 |

164

165



Current formatting for publication in BMJ Open

166 *Table 3. Results of themes from interviews with; general practitioners (GPs), gastroenterologists, familial cancer clinic staff*  
 167 *(FCC staff), and pharmacists mapped onto the Consolidated Framework for Implementation Research.*

| <b>Characteristics of Intervention</b>                                                                           | <b>Inner Setting</b>                                                                                                         | <b>Outer Setting</b>                                                                                                                                                | <b>Individuals Involved</b>                                                                                                 | <b>Implementation Process</b>                                                                                                           |
|------------------------------------------------------------------------------------------------------------------|------------------------------------------------------------------------------------------------------------------------------|---------------------------------------------------------------------------------------------------------------------------------------------------------------------|-----------------------------------------------------------------------------------------------------------------------------|-----------------------------------------------------------------------------------------------------------------------------------------|
| -The participants expressed confusion around the aspirin dosing (100-300 mg)                                     | - Participants agreed that having limited time would be a barrier to implementation as they are usually very busy            | - As the guidelines were first published by the Cancer Council Australia, they were more trustworthy                                                                | - Geneticists, pharmacists and gastroenterologists saw their role as advocates of the guidelines                            | - Participants thought of themselves as early adopters but agreed that it takes time for most clinicians to implement new interventions |
| -Some facilitators to aspirin implementation included; the low cost, availability and safety                     | - Pharmacists specifically saw their role to support what the GPs advise, and thought they should reiterate this to patients | - The ASPREE trial although it was a study done in the elderly (70 – 80-year-old) population, it introduced some hesitancy even for the 50 – 70-year-old population | - All clinicians agreed that it is GPs role to implement the guidelines into general practice, GPs agreed it was their role | - Participants agreed that patients would be receptive to the recommendations                                                           |
| -The ‘actively considered’ wording of the guidelines implied some uncertainty about the strength of the evidence |                                                                                                                              |                                                                                                                                                                     | - FCC staff were aware of the guidelines, but other clinicians had limited knowledge                                        | - A decision aid would be helpful in facilitating a discussion with patients                                                            |
| -The aspirin guidelines have changed over time which presents as a barrier to implementation                     |                                                                                                                              | - The guidelines have changed a lot over time for CVD                                                                                                               |                                                                                                                             |                                                                                                                                         |

168

## 1. Characteristics of the Intervention

### Aspirin

169 Many participants expressed confusion regarding the dose of aspirin recommended for colorectal  
 170 cancer prevention. While some participants were comfortable deciding on a dose within the 100 –  
 171 300mg range specified in the guidelines, others felt that this does range indicated uncertainty in the  
 172 guidelines. (Quotations 1a and 1b)

- 173 • 1a “Well I think the range is ambiguous there. The numbers are not ambiguous at all there I  
 174 suppose but it's just - it's out with normal practice I guess” General Practitioner, 30 years old
- 175 • 1b “And I think the risk in data coming out is how much is useful, like the dosage. We used to  
 176 think that a low dose used to be good for other cardiovascular events, but in fact maybe it  
 177 isn't depending on gender, age and weight.” Gastroenterologist, 47 years old

178 Aspirin was perceived as cheap, safe and readily available by many participants, who stated this  
 179 would facilitate their prescribing and patient uptake. With the rising costs of healthcare, participants  
 180 thought the cheap nature of aspirin facilitated the implementation of the guidelines. (Quotation 1c)

181 Barriers to implementation included concerns about possible side-effects of aspirin such as  
 182 gastrointestinal bleeding and contraindications in people with multiple comorbidities. (Quotation 1d)

- 183 • 1c “It's cheap, which is the other thing; and, again, in the Australian healthcare system,  
 184 where there are costs associated with a lot of treatments, to be able to recommend something  
 185 that is - we're saying safe, the exception being the gastric irritation, and effective, and it's not  
 186 going to break the bank for them to use it.” General practitioner, 62 years
- 187 • 1d “And in terms of weighing up the side effects from aspirin, we've got the issue of the  
 188 potential for those individuals who have got other comorbidities whether it's renal or

Current formatting for publication in BMJ Open

191 *allergies to aspirin or risk of stroke etc etc. You've got to weigh all those factors up before*  
 192 *you consider putting someone on aspirin" Gastroenterologist, 59 years old*

### 193 CCA guideline

194 Many participants mentioned the specific phrasing of the guidelines, namely that aspirin should be  
 195 "actively considered". This language did not sufficiently encourage them to prioritise the  
 196 recommendation, and implied uncertainty about the strength of evidence. (Quotation 1e)

- 197 • 1e *"Because it's not strong, also, perhaps that's something that will be its - not its downfall,*  
 198 *but will be negative because we already have a lot of strong guidelines" Geneticist, 32 years*  
 199 *old*

## 200 2. Inner Setting

201 Despite the variety of specialities and workplace types, a common theme emerged of competing  
 202 demands on clinicians' time limiting their capacity to discuss aspirin for the prevention of CRC.  
 203 (Quotations 2a, 2b) Pharmacists suggested they could support GPs in counselling patients, given GPs  
 204 have relatively short consultation times with their patients. Pharmacists commented on the closeness  
 205 of their location to GP clinics and their potential to reiterate advice about aspirin given by the GP.  
 206 (Quotation 2c)

- 207 • 2a *"I think time's our major challenge. There's just not enough time to... especially that the*  
 208 *pace that endoscopy list goes is fast and I think in private it's much faster. Public, even then;*  
 209 *even if it's not pace, the patients had an anaesthetic - it's not really an appropriate time to be*  
 210 *talking to them about long-term stuff." Gastroenterologist, 50 years old*
- 211 • 2b *"So we only actually see people when we can offer genetic testing and the rest of our work*  
 212 *is done over the phone or we send letters. We are absolutely flat out at the moment. This is*  
 213 *probably the only time today I will be sitting and not running around." Genetic counsellor, 35*  
 214 *years old*
- 215 • 2c *"I think, we should, way of promoting it, and probably we should be more proactive with*  
 216 *it, GPs tend to not... especially, one of the pharmacies I work at is next to a bulk billing clinic*  
 217 *doctors are very much get them in, get them out, and don't spend much time with them. so*  
 218 *that's where we can often come in to be that extra person that can either reinforce what the*  
 219 *doctor's told them or suggest other things. So, we should be there in the front line, yeah,*  
 220 *promoting health." Pharmacist, 50 years old*

## 222 3. Outer Setting

223 Cancer Council Australia was perceived as a trustworthy organisation and this gave greater weight to  
 224 and trust in the guidelines. (Quotation 3a)

- 225 • 3a *"Look as long as this is done by the Cancer Council of Victoria, I'm trusting them so it*  
 226 *depends who is it behind, but this is a credible source of information I would have hoped."*  
 227 *General Practitioner, 58 years old*

228 The initial results of the Aspirin in Reducing Events in the Elderly (ASPREE) Trial were published  
 229 after the Cancer Council Australia national clinical guidelines were released, and shortly before  
 230 interviews for this study were conducted.<sup>8</sup> The ASPREE trial showed low-dose aspirin provided no  
 231 benefit in participants aged 70-80 years over a short-term follow up of 4.7 years.<sup>9</sup> Some participants  
 232 in our study, despite varying degrees of knowledge of the ASPREE trial results, were hesitant to  
 233 recommend aspirin for people even in the 50 to 70-year-old group covered by the guidelines, due to  
 234 the findings of the ASPREE trial despite being conducted in a different age cohort. (Quotations 3b  
 235 and 3c).

Current formatting for publication in BMJ Open

- 1  
2  
3 236 • 3b *"So that negative study for aspirin in older patients; kind of makes me think- should I be*  
4 237 *giving it to someone with average risk of colorectal cancer?" Gastroenterologist, 32 years*  
5 238 *old*
- 7 239 • 3c *"So there was a big study here in Australia, and then a little bit of input from the US done*  
8 240 *over the last few years, came out last year, the ASPREE study, so I did a talk on it, so I looked*  
9 241 *at the primary prevention of aspirin in the cardiovascular disease, and it showed that low-*  
10 242 *dose aspirin for healthy older adults had no impact on primary prevention and*  
11 243 *cardiovascular risk"* Pharmacist, 26 years old

13 244 Guidelines on the use of aspirin for disease prevention have changed over time, generating confusion  
14 245 among participants. Historically, aspirin was recommended for primary prevention of cardiovascular  
15 246 disease in certain at-risk patients, but guidelines were later altered, recommending it only for  
16 247 secondary prevention.<sup>10,11</sup> Participants stated that it is hard to keep up with the latest  
17 248 recommendations, and that this ongoing change in advice caused reluctance to recommend them.  
18 249 (Quotation 3d)

- 21 250 • 3d *"With aspirin, it was always for stroke prevention, and now they're turning around and*  
22 251 *saying no, we shouldn't be doing it for that! And you sort of wonder, well, is this going to be*  
23 252 *the same sort of thing? The, one of the issues with medications and guidelines as such is that*  
24 253 *they keep changing."* Pharmacist, 50 years old

#### 25 254

#### 28 255 **4. Characteristics of Individuals**

29 256 **Whose role is it to recommend aspirin?**

30 257 Hospital-based clinicians generally supported the guidelines and saw their role as advocates rather  
31 258 than implementers of the guidelines. (Quotations 4a and 4b) All participants, including GPs, saw that  
32 259 the primary responsibility to implement the aspirin guidelines rested in primary care. (Quotations 4c  
33 260 and 4d)

- 36 261 • 4a *"So, you know I'm a Geneticist. I think talking to GPs and Gastroenterologists would be a*  
37 262 *much better group [laughs] than Geneticists."* Geneticist, 34 years old
- 39 263 • 4b *"People are still very GP centred, so a lot of, even if we suggest things like this, a lot of*  
40 264 *people would still then go and talk to their GP before they decided to start something."*  
41 265 *Pharmacist, 50 years old*
- 43 266 • 4c *"If you understand what I mean, it's absolutely...I agree with those specialists, I do think it*  
44 267 *is part of the role of the GP to talk about these preventative health issues specifically*  
45 268 *prescribing aspirin"* General practitioner, 28 years old
- 47 269 • 4d *"It's interesting when new guidelines come out, because guidelines come out all the time,*  
48 270 *and this is a really - this is our bread and butter as a GP"* General practitioner, 48 years old

50 271 **Knowledge / awareness of the CCA guidelines**

51 272 Knowledge and awareness of the guidelines was mixed. The FCC staff were more knowledgeable of  
52 273 the guidelines, specifically as they work with populations at increased risk of CRC, and awareness of  
53 274 recommendations about aspirin use in people with Lynch syndrome. Whereas GPs, pharmacists and  
54 275 gastroenterologists were either unaware or had limited knowledge of the guidelines. (Quotations 4e  
55 276 and 4f)

- 57 277 • 4e *"All I know about low-dose aspirin in bowel cancer is that it can be used, but in certain*  
58 278 *populations, but beyond that, I actually really don't know."* Geneticist, 32 years old

Current formatting for publication in BMJ Open

- 1  
2  
3 279 • 4f "I would say that going across, we have three different clinicians at work, and I don't think  
4 280 I've ever heard them recommend aspirin for someone who actually doesn't have something  
5 281 like Lynch syndrome." Genetic counsellor, 57 years old

## 7 282 5. Process

### 8 283 Implementation of the CCA guidelines

9 284 While most participants considered themselves as early adopters, they admitted that clinicians in  
10 285 general would wait before adopting new clinical guidelines. (Quotation 5a) Most health professionals  
11 286 agreed that patients would be receptive to taking extra medication such as aspirin for CRC prevention.  
12 287 (Quotation 5b) Nevertheless, a decision aid was thought to be potentially useful to facilitate  
13 288 discussion about the risks and benefits of taking aspirin. (Quotation 5c) Several participants could see  
14 289 how they could discuss aspirin as part of their usual consultation. (Quotation 5d)

- 17 290 • 5a "Other doctors like to be on the tail end because they've been burnt a few times when  
18 291 things have kind of flipped back the other way." General practitioner, 38 years old
- 20 292 • 5b "You know, I think the people who already take tablets for something find it quite easy to  
21 293 beguile an extra tablet. So, someone's already on a cholesterol tablet, they're on a high blood  
22 294 pressure tablet, it's easy for them to add aspirin to that." Gastroenterologist, 60 years old
- 24 295 • 5c "Well that (a decision aid) might have been useful for the patient to show them what could  
25 296 happen and how effective it is if they ask." General practitioner, 58 years old
- 27 297 • 5d "You know, I appreciate they're guidelines and they're not mandatory, and if it fits in with  
28 298 the way I would practice, I'm happy to sort of incorporate them into what I do."  
29 299 Gastroenterologist, 65 years old

## 31 300 Discussion

32 301 This is the first study to our knowledge to examine the perspectives of a wide range of Australian  
33 302 clinicians about recommending aspirin to reduce bowel cancer risk. Aspirin was considered as readily  
34 303 available, affordable and safe. However, the ambiguity about the recommended dose and perceived  
35 304 strength of the evidence was a concern for several clinicians. The media attention about the ASPREE  
36 305 trial<sup>12</sup> added to the perceived uncertainty about the evidence. Busy work environments meant limited  
37 306 time to spend on prevention. The endorsement from Cancer Council Australia, a nationwide not-for-  
38 307 profit organisation, meant the guidelines were perceived as trustworthy and therefore more likely to  
39 308 be implemented.

43 309 FCC staff and gastroenterologists are generally aware of aspirin recommendations for patients at  
44 310 increased CRC risk and suggested that GPs are better placed to discuss aspirin in those at average  
45 311 risk. These hospital specialists felt they could advocate the use of aspirin but the ultimate  
46 312 responsibility for initiation rested in general practice. Pharmacists similarly felt they could facilitate  
47 313 the process but would not initiate discussions about aspirin. GPs agreed that this was part of their role,  
48 314 for example when discussing bowel cancer screening, but had limited awareness of the guidelines.

50 315 There is often a large investment of time, resources and clinical expertise involved in producing  
51 316 national clinical guidelines, however, there is typically no accompanying strategy to implement  
52 317 them.<sup>13,14</sup> Between 2003 and 2007, 313 clinical practice guidelines were produced in Australia by over  
53 318 80 guideline producers<sup>15</sup>, but with limited clinical uptake.<sup>16,17</sup>

55 319 The uptake of guidelines into clinical practice is influenced by several factors including the guideline  
56 320 characteristics, ease of implementation, clarity of the guidelines and individual clinicians' familiarity  
57 321 with the intervention and evidence.<sup>18</sup> Our study highlights several of these factors which could act as  
58 322 barriers to widespread implementation of the aspirin guidelines. Superficially, one might expect

Current formatting for publication in BMJ Open

323 recommending a familiar, low cost, over-the-counter drug would be easily implemented. But lack of  
324 clarity, partly due to the specific wording of the recommendation, could alter perceptions of the  
325 evidence and jeopardise uptake of the guideline.

326 Uncertainties amongst clinicians about the evidence for aspirin in disease prevention is exacerbated  
327 by changes in recommendations about its use in cardiovascular disease. The Cancer Council Australia  
328 guideline specifically considered the evidence as it relates to preventing colorectal cancer. It did not  
329 discuss related evidence of reduced incidence and mortality from other cancers<sup>3</sup> or for the primary  
330 prevention of cardiovascular disease.<sup>19</sup> The US Preventative Services Taskforce recommends aspirin  
331 for CRC prevention only in people who are also at moderately increased risk of cardiovascular  
332 disease.<sup>20</sup> In addition, their recommendations about its use are stronger for people aged 50 to 59  
333 years, compared with those aged 60 to 69 years because the risk of serious side-effects from aspirin  
334 increases with age.

335 There was little awareness amongst many participants of the additional effects of aspirin on all-cancer  
336 incidence and mortality, but this is an important additional consideration for patients when making  
337 informed decisions about taking aspirin. Clinicians in our study recognised the potential benefit of a  
338 decision aid to support discussions about taking aspirin. There is strong evidence to show that  
339 decision aids can support informed decision making, particularly when decisions require weighing up  
340 benefits and risks which are preference sensitive.<sup>21</sup> Patients need to understand the potential benefits  
341 of aspirin in terms of reduced incidence and death from cancer and cardiovascular disease, and harms  
342 from gastrointestinal and intracranial haemorrhage. In a vignette study testing graphical approaches to  
343 communicating these harms and benefits from aspirin, over 70% of Australian patients aged 50-70  
344 were willing to take aspirin for disease prevention.<sup>22</sup> The use of a decision aid has the potential to  
345 inform the clinicians which addresses a major barrier to implementation, as GPs have limited  
346 awareness of the guidelines. A decision aid would enhance the clarity of the recommendation and  
347 facilitate a discussion about the aspirin guidelines with patients.

### 348 Implications & limitations

349 In this in-depth qualitative study, we recruited a large sample of diverse participants representing  
350 different clinical disciplines, varied length of experience, and work settings. Although we recruited  
351 participants only from Victoria, we believe our findings are likely to be transferable to other  
352 Australian clinicians although we acknowledge that there may be other barriers and facilitators  
353 experienced by clinicians from remote locations.

354 The national guidelines on aspirin represent an important new approach to reducing the incidence and  
355 mortality of bowel cancer in Australia. But the absence of a strategic and more active implementation  
356 plan, means these guidelines are less likely to be translated into clinical practice.<sup>23</sup> Specific  
357 implementation strategies for general practice are necessary to increase the awareness and uptake of  
358 these guidelines. Our findings suggest that a stronger statement of recommendation and clarity about  
359 dosage are required. Engagement with pharmacists is also necessary to ensure they are aware of the  
360 guidelines and are prepared to endorse any advice from someone's GP about using aspirin. These  
361 implementation strategies could be supplemented by approaches to raise awareness in the community  
362 about the role of aspirin and decision aids to facilitate discussions between GPs and patients and  
363 support informed choices about CRC prevention.

364

Current formatting for publication in BMJ Open

365 **Author statement:**

366 Conception or design of the work: SM JM, FM, and JE. Acquisition, analysis or interpretation of data:  
367 SM, JM, TY, PA, SS NK, PN. Drafting the work: SM. Critically revising the work: SM, SS, PL and  
368 JE. Final approval of submitted version: all authors.

369 **Ethics Approval:** Ethical approval was provided by the Human Ethics Sub-Committee of the  
370 University of Melbourne (Ethics ID:1853266) and all participants provided informed written consent  
371 before taking part in this project.

372 **Twitter:** Shakira Milton @ShakiraMilton

373 **ORCID IDs:** Shakira Milton <https://orcid.org/0000-0002-8510-6351>

374 Jennifer McIntosh <https://orcid.org/0000-0002-6655-0940>

375 Thivagar Yogaparan <https://orcid.org/0000-0003-3840-2999>

376 Pavithran Alphonse <https://orcid.org/0000-0003-3840-2999>

377 Sibel Saya <https://orcid.org/0000-0002-4796-6852>

378 Peter Nguyen <https://orcid.org/0000-0002-8282-7663>

379 Phyllis Lau <https://orcid.org/0000-0002-0665-6348>

380 Jon Emery [0000-0002-5274-6336](https://orcid.org/0000-0002-5274-6336)

381 **Funding:** This project was funded by a dedicated grant from the Victorian Comprehensive Cancer  
382 Centre Precision Prevention Program: VCCC 075739

383 **Data availability:** Extra data can be accessed via the Dryad data repository at <http://datadryad.org/>  
384 with the doi:10.5061/dryad.gljwstqq2

385 **Competing interests:** JE and FM were members of the Cancer Council Australia guideline  
386 development group which recommends the use of low dose aspirin for the prevention of colorectal  
387 cancer.

388 **References**

- 389 1. Australian Institute of Health and Welfare. *Cancer in Australia. Cancer in Australia* (2019).  
390 doi:Cancer series no. 119. Cat. no. CAN123.
- 391 2. Chemopreventive candidate agents - Clinical Guidelines Wiki. Available at:  
392 [https://wiki.cancer.org.au/australia/Clinical\\_question:Aspirin\\_for\\_prevention\\_of\\_colorectal\\_ca](https://wiki.cancer.org.au/australia/Clinical_question:Aspirin_for_prevention_of_colorectal_cancer)  
393 ncer. (Accessed: 8th November 2019)
- 394 3. Rothwell, P. M. *et al.* Effect of daily aspirin on long-term risk of death due to cancer: analysis  
395 of individual patient data from randomised trials. *Lancet* **377**, 31–41 (2011).
- 396 4. Aspirin in the primary and secondary prevention of vascular disease: collaborative meta-  
397 analysis of individual participant data from randomised trials. *Lancet* **373**, 1849–1860 (2009).
- 398 5. CFIR Booklet. Available at: [http://cfirwiki.net/guide/app/index.html#/guide\\_select](http://cfirwiki.net/guide/app/index.html#/guide_select). (Accessed:  
399 7th November 2019)
- 400 6. Constructs | The Consolidated Framework for Implementation Research. Available at:  
401 <https://cfirguide.org/constructs/>. (Accessed: 8th November 2019)
- 402 7. QSR International Pty Ltd. (2018) NVivo (Version  
403 12), <https://www.qsrinternational.com/nvivo-qualitative-data-analysis-software/home>.  
404 (Accessed: 8th November 2019)
- 405 8. McNeil, J. J. *et al.* Effect of Aspirin on Disability-free Survival in the Healthy Elderly. *N.*  
406 *Engl. J. Med.* **379**, 1499–1508 (2018).
- 407 9. McNeil, J. J. *et al.* Effect of Aspirin on All-Cause Mortality in the Healthy Elderly. *N. Engl. J.*

Current formatting for publication in BMJ Open

- 1  
2  
3 408 *Med.* **379**, 1519–1528 (2018).  
4  
5 409 10. Matthys, F., De Backer, T., De Backer, G. & Stichele, R. Vander. Review of guidelines on  
6 410 primary prevention of cardiovascular disease with aspirin: How much evidence is needed to  
7 411 turn a tanker? *European Journal of Preventive Cardiology* **21**, 354–365 (2014).  
8  
9 412 11. Schnell, O., Erbach, M. & Hummel, M. Primary and secondary prevention of cardiovascular  
10 413 disease in diabetes with aspirin. *Diabetes and Vascular Disease Research* **9**, 245–255 (2012).  
11 414 12. Mcneil, J. J. *et al.* Medical Sciences cite as. *J Gerontol A Biol Sci Med Sci* **72**, 1586–1593  
12 415 (2017).  
13  
14 416 13. Kredo, T. *et al.* Guide to clinical practice guidelines: the current state of play. *Int. J. Qual.*  
15 417 *Heal. Care* **28**, 122–128 (2016).  
16  
17 418 14. Guide to the development, evaluation and implementation of clinical practice guidelines |  
18 419 NHMRC. Available at: [https://www.nhmrc.gov.au/about-us/publications/guide-development-](https://www.nhmrc.gov.au/about-us/publications/guide-development-evaluation-and-implementation-clinical-practice-guidelines)  
19 420 [evaluation-and-implementation-clinical-practice-guidelines](https://www.nhmrc.gov.au/about-us/publications/guide-development-evaluation-and-implementation-clinical-practice-guidelines). (Accessed: 1st April 2020)  
20  
21 421 15. Buchan, H. A., Currie, K. C., Lourey, E. J. & Duggan, G. R. Australian clinical practice  
22 422 guidelines — a national study. *Med. J. Aust.* **192**, 490–494 (2010).  
23  
24 423 16. Jiang, V., Brooks, E. M., Tong, S. T., Heintzman, J. & Krist, A. H. Factors Influencing Uptake  
25 424 of Changes to Clinical Preventive Guidelines. *J. Am. Board Fam. Med.* **33**, 271–278  
26 425 (2020).  
27  
28 426 17. Raz, D. J. *et al.* Perceptions and utilization of lung cancer screening among primary care  
29 427 physicians. *J. Thorac. Oncol.* **11**, 1856–1862 (2016).  
30  
31 428 18. Turner, S. *et al.* Evidence use in decision-making on introducing innovations: A systematic  
32 429 scoping review with stakeholder feedback. *Implementation Science* **12**, 145 (2017).  
33  
34 430 19. Aspirin in the primary and secondary prevention of vascular disease: collaborative meta-  
35 431 analysis of individual participant data from randomised trials. *Lancet* **373**, 1849–1860 (2009).  
36  
37 432 20. Bibbins-Domingo, K. *et al.* Aspirin use for the primary prevention of cardiovascular disease  
38 433 and colorectal cancer: U.S. preventive services task force recommendation statement. *Annals*  
39 434 *of Internal Medicine* **164**, 836–845 (2016).  
40  
41 435 21. Stacey, D. *et al.* Decision aids for people facing health treatment or screening decisions.  
42 436 *Cochrane Database Syst. Rev.* (2017). doi:10.1002/14651858.CD001431.pub5  
43  
44 437 22. Nguyen, P. *et al.* Benefits and harms of aspirin to reduce colorectal cancer risk: A cross-  
45 438 sectional study of methods to communicate risk in primary care. *Br. J. Gen. Pract.* **69**, E843–  
46 439 E849 (2019).  
47  
48 440 23. Jiang, V., Brooks, E. M., Tong, S. T., Heintzman, J. & Krist, A. H. Factors Influencing Uptake  
49 441 of Changes to Clinical Preventive Guidelines. doi:10.3122/jabfm.2020.02.190146  
50  
51  
52  
53  
54  
55  
56  
57  
58  
59  
60

## Supplementary Materials

### **Clinicians' opinions on recommending aspirin to prevent colorectal cancer to Australians aged 50 to 70 years: a qualitative study**

#### **S1. Interview schedule**

Clinicians' interviews will be guided by the following schedule which only provides general areas to be covered.

**\*\*Remind them that you'll be recording the interview and START recording**

#### **DEMOGRAPHICS**

- Age, gender, years of practice, specialization, place(s) of work: clinic(s) or hospital(s)

#### **INTRODUCE CANCER COUNCIL GUIDELINES**

*(Show laminated version of summary / recommendations)*

- Are you aware of the new guidelines? What is your understanding of the aspirin recommendations?
- Are you aware of guidelines that recommend prescribing aspirin to prevent bowel cancer?

#### **OPINION ON GUIDELINES**

- *If aware of guidelines:* what is your professional opinion of them?
- What are your thoughts underpinning the evidence around these guidelines?
- What do you think about using aspirin to prevent bowel cancer?
- Are you aware of the potential benefits and harms of using aspirin to prevent bowel cancer?
- Do you have clinical experience with the harms of using aspirin?

#### **CURRENT PRACTICE/ PREVENTION**

- When you consult with patients, what bowel cancer and cardiovascular disease prevention strategies do you incorporate into the consultation?
- Do you think this is part of your role as a general practitioner?
  - *If not:* whose role do you think it is?
- Do you currently recommend aspirin to patients?
- Which patients would you and would you not consider recommending aspirin to? Why?
  - Specific conditions, prevention?
  - How about those with or without a family history (e.g. Lynch syndrome)?



### **PATIENT OPINION**

- What do think your patients would feel about using aspirin preventively?
- Have you had any feedback from patients about their experience of using aspirin preventively?

### **PATIENT EDUCATION**

- How would you go about explaining the benefits and potential harms of taking aspirin?
- What supportive information would you use and why?

### **INTRODUCE EXPECTED FREQUENCY TREES**

*Show clinician the 2 expected frequency trees – **incidence** and **mortality**. Provide **evidence** for where the **numbers come from**. Emphasise it was developed for people aged **50-70**.*

- What do you think about the EFT?
- Would the decision aid be helpful in these discussions with pts?

### **NEW GUIDELINE IMPLEMENTATION: ROUTINE PRACTICE**

- Generally, when there is a new guideline, how do you find out about it?
- How do you incorporate new guidelines into practice?
- What challenges do you encounter when implementing new guidelines?
  - Private vs public
- How does your clinic/hospital implement new guidelines?
- Are you more likely to be early adopter or late adopter for new guidelines? Do you tend to wait to see what your colleagues are doing before starting to adopt new recommendations?

## COREQ (CONsolidated criteria for REporting Qualitative research) Checklist

A checklist of items that should be included in reports of qualitative research. You must report the page number in your manuscript where you consider each of the items listed in this checklist. If you have not included this information, either revise your manuscript accordingly before submitting or note N/A.

| Topic                                          | Item No. | Guide Questions/Description                                                                                                                              | Reported on Page No. |
|------------------------------------------------|----------|----------------------------------------------------------------------------------------------------------------------------------------------------------|----------------------|
| <b>Domain 1: Research team and reflexivity</b> |          |                                                                                                                                                          |                      |
| <i>Personal characteristics</i>                |          |                                                                                                                                                          |                      |
| Interviewer/facilitator                        | 1        | Which author/s conducted the interview or focus group?                                                                                                   |                      |
| Credentials                                    | 2        | What were the researcher's credentials? E.g. PhD, MD                                                                                                     |                      |
| Occupation                                     | 3        | What was their occupation at the time of the study?                                                                                                      |                      |
| Gender                                         | 4        | Was the researcher male or female?                                                                                                                       |                      |
| Experience and training                        | 5        | What experience or training did the researcher have?                                                                                                     |                      |
| <i>Relationship with participants</i>          |          |                                                                                                                                                          |                      |
| Relationship established                       | 6        | Was a relationship established prior to study commencement?                                                                                              |                      |
| Participant knowledge of the interviewer       | 7        | What did the participants know about the researcher? e.g. personal goals, reasons for doing the research                                                 |                      |
| Interviewer characteristics                    | 8        | What characteristics were reported about the interviewer/facilitator? e.g. Bias, assumptions, reasons and interests in the research topic                |                      |
| <b>Domain 2: Study design</b>                  |          |                                                                                                                                                          |                      |
| <i>Theoretical framework</i>                   |          |                                                                                                                                                          |                      |
| Methodological orientation and Theory          | 9        | What methodological orientation was stated to underpin the study? e.g. grounded theory, discourse analysis, ethnography, phenomenology, content analysis |                      |
| <i>Participant selection</i>                   |          |                                                                                                                                                          |                      |
| Sampling                                       | 10       | How were participants selected? e.g. purposive, convenience, consecutive, snowball                                                                       |                      |
| Method of approach                             | 11       | How were participants approached? e.g. face-to-face, telephone, mail, email                                                                              |                      |
| Sample size                                    | 12       | How many participants were in the study?                                                                                                                 |                      |
| Non-participation                              | 13       | How many people refused to participate or dropped out? Reasons?                                                                                          |                      |
| <i>Setting</i>                                 |          |                                                                                                                                                          |                      |
| Setting of data collection                     | 14       | Where was the data collected? e.g. home, clinic, workplace                                                                                               |                      |
| Presence of non-participants                   | 15       | Was anyone else present besides the participants and researchers?                                                                                        |                      |
| Description of sample                          | 16       | What are the important characteristics of the sample? e.g. demographic data, date                                                                        |                      |
| <i>Data collection</i>                         |          |                                                                                                                                                          |                      |
| Interview guide                                | 17       | Were questions, prompts, guides provided by the authors? Was it pilot tested?                                                                            |                      |
| Repeat interviews                              | 18       | Were repeat interviews carried out? If yes, how many?                                                                                                    |                      |
| Audio/visual recording                         | 19       | Did the research use audio or visual recording to collect the data?                                                                                      |                      |
| Field notes                                    | 20       | Were field notes made during and/or after the interview or focus group?                                                                                  |                      |
| Duration                                       | 21       | What was the duration of the interviews or focus group?                                                                                                  |                      |
| Data saturation                                | 22       | Was data saturation discussed?                                                                                                                           |                      |
| Transcripts returned                           | 23       | Were transcripts returned to participants for comment and/or                                                                                             |                      |

| Topic                                  | Item No. | Guide Questions/Description                                                                                                        | Reported on Page No. |
|----------------------------------------|----------|------------------------------------------------------------------------------------------------------------------------------------|----------------------|
|                                        |          | correction?                                                                                                                        |                      |
| <b>Domain 3: analysis and findings</b> |          |                                                                                                                                    |                      |
| <i>Data analysis</i>                   |          |                                                                                                                                    |                      |
| Number of data coders                  | 24       | How many data coders coded the data?                                                                                               |                      |
| Description of the coding tree         | 25       | Did authors provide a description of the coding tree?                                                                              |                      |
| Derivation of themes                   | 26       | Were themes identified in advance or derived from the data?                                                                        |                      |
| Software                               | 27       | What software, if applicable, was used to manage the data?                                                                         |                      |
| Participant checking                   | 28       | Did participants provide feedback on the findings?                                                                                 |                      |
| <i>Reporting</i>                       |          |                                                                                                                                    |                      |
| Quotations presented                   | 29       | Were participant quotations presented to illustrate the themes/findings?<br>Was each quotation identified? e.g. participant number |                      |
| Data and findings consistent           | 30       | Was there consistency between the data presented and the findings?                                                                 |                      |
| Clarity of major themes                | 31       | Were major themes clearly presented in the findings?                                                                               |                      |
| Clarity of minor themes                | 32       | Is there a description of diverse cases or discussion of minor themes?                                                             |                      |

Developed from: Tong A, Sainsbury P, Craig J. Consolidated criteria for reporting qualitative research (COREQ): a 32-item checklist for interviews and focus groups. *International Journal for Quality in Health Care*. 2007. Volume 19, Number 6: pp. 349 – 357

**Once you have completed this checklist, please save a copy and upload it as part of your submission. DO NOT include this checklist as part of the main manuscript document. It must be uploaded as a separate file.**

SPQR checklist for Clinicians' opinions on recommending aspirin to prevent colorectal cancer to Australians aged 50 to 70 years: a qualitative study

### Standards for Reporting Qualitative Research (SRQR)\*

<http://www.equator-network.org/reporting-guidelines/srqr/>

Page/line no(s).

#### Title and abstract

|                                                                                                                                                                                                                                                              |                    |
|--------------------------------------------------------------------------------------------------------------------------------------------------------------------------------------------------------------------------------------------------------------|--------------------|
| <p><b>Title</b> - Concise description of the nature and topic of the study Identifying the study as qualitative or indicating the approach (e.g., ethnography, grounded theory) or data collection methods (e.g., interview, focus group) is recommended</p> | Page 1/ line 1-3   |
| <p><b>Abstract</b> - Summary of key elements of the study using the abstract format of the intended publication; typically includes background, purpose, methods, results, and conclusions</p>                                                               | Page 2/ line 35-62 |

#### Introduction

|                                                                                                                                                                     |                    |
|---------------------------------------------------------------------------------------------------------------------------------------------------------------------|--------------------|
| <p><b>Problem formulation</b> - Description and significance of the problem/phenomenon studied; review of relevant theory and empirical work; problem statement</p> | Page 3/ line 75-90 |
| <p><b>Purpose or research question</b> - Purpose of the study and specific objectives or questions</p>                                                              | Page 3/ line 91-94 |

#### Methods

|                                                                                                                                                                                                                                                                                                                                                                                                             |                                     |
|-------------------------------------------------------------------------------------------------------------------------------------------------------------------------------------------------------------------------------------------------------------------------------------------------------------------------------------------------------------------------------------------------------------|-------------------------------------|
| <p><b>Qualitative approach and research paradigm</b> - Qualitative approach (e.g., ethnography, grounded theory, case study, phenomenology, narrative research) and guiding theory if appropriate; identifying the research paradigm (e.g., postpositivist, constructivist/ interpretivist) is also recommended; rationale**</p>                                                                            | Page 3/ line 99<br>Page 3/ line 100 |
| <p><b>Researcher characteristics and reflexivity</b> - Researchers' characteristics that may influence the research, including personal attributes, qualifications/experience, relationship with participants, assumptions, and/or presuppositions; potential or actual interaction between researchers' characteristics and the research questions, approach, methods, results, and/or transferability</p> | Page 4/ lines 120 - 126             |
| <p><b>Context</b> - Setting/site and salient contextual factors; rationale**</p>                                                                                                                                                                                                                                                                                                                            | Page 3/ line 105                    |
| <p><b>Sampling strategy</b> - How and why research participants, documents, or events were selected; criteria for deciding when no further sampling was necessary (e.g., sampling saturation); rationale**</p>                                                                                                                                                                                              | Page 3/ line 104                    |
| <p><b>Ethical issues pertaining to human subjects</b> - Documentation of approval by an appropriate ethics review board and participant consent, or explanation for lack thereof; other confidentiality and data security issues</p>                                                                                                                                                                        | Page 10 / line 345 - 347            |

|                        |                                                                                                                                                                                                                                                                                                                          |                                    |
|------------------------|--------------------------------------------------------------------------------------------------------------------------------------------------------------------------------------------------------------------------------------------------------------------------------------------------------------------------|------------------------------------|
| 1<br>2<br>3<br>4<br>5  | <b>Data collection methods</b> - Types of data collected; details of data collection procedures including (as appropriate) start and stop dates of data collection and analysis, iterative process, triangulation of sources/methods, and modification of procedures in response to evolving study findings; rationale** | Page 3/ line 113                   |
| 6<br>7<br>8<br>9<br>10 | <b>Data collection instruments and technologies</b> - Description of instruments (e.g., interview guides, questionnaires) and devices (e.g., audio recorders) used for data collection; if/how the instrument(s) changed over the course of the study                                                                    | Page 4/ line 126                   |
| 11<br>12<br>13         | <b>Units of study</b> - Number and relevant characteristics of participants, documents, or events included in the study; level of participation (could be reported in results)                                                                                                                                           | Page 5/ line 143 and line 151      |
| 14<br>15<br>16<br>17   | <b>Data processing</b> - Methods for processing data prior to and during analysis, including transcription, data entry, data management and security, verification of data integrity, data coding, and anonymization/de-identification of excerpts                                                                       | Page 4/ line 126                   |
| 18<br>19<br>20<br>21   | <b>Data analysis</b> - Process by which inferences, themes, etc., were identified and developed, including the researchers involved in data analysis; usually references a specific paradigm or approach; rationale**                                                                                                    | Page 4/ line 128-129/ line 131-138 |
| 22<br>23<br>24<br>25   | <b>Techniques to enhance trustworthiness</b> - Techniques to enhance trustworthiness and credibility of data analysis (e.g., member checking, audit trail, triangulation); rationale**                                                                                                                                   | Page 4/ line 134- 135              |

## Results/findings

|                                  |                                                                                                                                                                                                   |                          |
|----------------------------------|---------------------------------------------------------------------------------------------------------------------------------------------------------------------------------------------------|--------------------------|
| 26<br>27<br>28<br>29<br>30<br>31 | <b>Synthesis and interpretation</b> - Main findings (e.g., interpretations, inferences, and themes); might include development of a theory or model, or integration with prior research or theory | Page 5-8/ line 143 - 280 |
| 32<br>33<br>34                   | <b>Links to empirical data</b> - Evidence (e.g., quotes, field notes, text excerpts, photographs) to substantiate analytic findings                                                               | Page 5-8/ line 143 - 280 |

## Discussion

|                                                    |                                                                                                                                                                                                                                                                                                                                                                                                             |                           |
|----------------------------------------------------|-------------------------------------------------------------------------------------------------------------------------------------------------------------------------------------------------------------------------------------------------------------------------------------------------------------------------------------------------------------------------------------------------------------|---------------------------|
| 35<br>36<br>37<br>38<br>39<br>40<br>41<br>42<br>43 | <b>Integration with prior work, implications, transferability, and contribution(s) to the field</b> - Short summary of main findings; explanation of how findings and conclusions connect to, support, elaborate on, or challenge conclusions of earlier scholarship; discussion of scope of application/generalizability; identification of unique contribution(s) to scholarship in a discipline or field | Page 8- 9/ line 282 - 327 |
| 44<br>45                                           | <b>Limitations</b> - Trustworthiness and limitations of findings                                                                                                                                                                                                                                                                                                                                            | Page 9/ line 334 - 340    |

## Other

|                            |                                                                                                                                               |                         |
|----------------------------|-----------------------------------------------------------------------------------------------------------------------------------------------|-------------------------|
| 46<br>47<br>48<br>49<br>50 | <b>Conflicts of interest</b> - Potential sources of influence or perceived influence on study conduct and conclusions; how these were managed | Page 10/ line 359 - 361 |
| 51<br>52<br>53             | <b>Funding</b> - Sources of funding and other support; role of funders in data collection, interpretation, and reporting                      | Page 10/ line 357 - 358 |
