# Supplementary material for: Clinicians’ opinions on recommending aspirin to prevent colorectal cancer to Australians aged 50–70 years: a qualitative study
Source: PubMed Central journal article supplement — BMJ Open. 2021 Feb 5;11(2):e042261. doi: 10.1136/bmjopen-2020-042261 (PMC7925937; doi:10.1136/bmjopen-2020-042261), 2021-02-05
Supplement: bmjopen-2020-042261supp001.pdf [file bmjopen-2020-042261supp001.pdf]

## Supplementary Materials

### **Clinicians' opinions on recommending aspirin to prevent colorectal cancer to Australians aged 50 to 70 years: a qualitative study**

#### **S1. Interview schedule**

Clinicians' interviews will be guided by the following schedule which only provides general areas to be covered.

**\*\*Remind them that you'll be recording the interview and START recording**

#### **DEMOGRAPHICS**

- Age, gender, years of practice, specialization, place(s) of work: clinic(s) or hospital(s)

#### **INTRODUCE CANCER COUNCIL GUIDELINES**

*(Show laminated version of summary / recommendations)*

- Are you aware of the new guidelines? What is your understanding of the aspirin recommendations?
- Are you aware of guidelines that recommend prescribing aspirin to prevent bowel cancer?

#### **OPINION ON GUIDELINES**

- *If aware of guidelines:* what is your professional opinion of them?
- What are your thoughts underpinning the evidence around these guidelines?
- What do you think about using aspirin to prevent bowel cancer?
- Are you aware of the potential benefits and harms of using aspirin to prevent bowel cancer?
- Do you have clinical experience with the harms of using aspirin?

#### **CURRENT PRACTICE/ PREVENTION**

- When you consult with patients, what bowel cancer and cardiovascular disease prevention strategies do you incorporate into the consultation?
- Do you think this is part of your role as a general practitioner?
  - *If not:* whose role do you think it is?
- Do you currently recommend aspirin to patients?
- Which patients would you and would you not consider recommending aspirin to? Why?
  - Specific conditions, prevention?
  - How about those with or without a family history (e.g. Lynch syndrome)?

### **PATIENT OPINION**

- What do think your patients would feel about using aspirin preventively?
- Have you had any feedback from patients about their experience of using aspirin preventively?

### **PATIENT EDUCATION**

- How would you go about explaining the benefits and potential harms of taking aspirin?
- What supportive information would you use and why?

### **INTRODUCE EXPECTED FREQUENCY TREES**

Show clinician the 2 expected frequency trees – **incidence** and **mortality**. Provide **evidence** for where the **numbers come from**. Emphasise it was developed for people aged **50-70**.

- What do you think about the EFT?
- Would the decision aid be helpful in these discussions with pts?

### **NEW GUIDELINE IMPLEMENTATION: ROUTINE PRACTICE**

- Generally, when there is a new guideline, how do you find out about it?
- How do you incorporate new guidelines into practice?
- What challenges do you encounter when implementing new guidelines?
  - Private vs public
- How does your clinic/hospital implement new guidelines?
- Are you more likely to be early adopter or late adopter for new guidelines? Do you tend to wait to see what your colleagues are doing before starting to adopt new recommendations?
